# Supplementary material for: Advances in thermal physiology of diving marine mammals: The dual role of peripheral perfusion
Source: PubMed Central journal article supplement (PMC9154795; doi:10.1080/23328940.2021.1988817), 2021-12-18
Supplement: KTMP_A_1988817_SM5650.pdf [file KTMP_A_1988817_SM5650.pdf]

Supplementary File

Publications organized by year since 1940 relevant to the thermal physiology of marine mammals. Refer to the caption of Figure 1 for an explanation of what types of publications were included, how they were classified, and how the different categories are defined. The following are indicated in the 'Notes' column: (1) studies that are relevant but traditionally considered a study on diving physiology; (2) whether field studies were performed on land or in the water; (3) the type of biotelemetry technology used for studies that used biotelemetry to study physiology and/or behavior in the lab or field. Biotelemetry methods for (1) physiology: STP = stomach temperature pill (a temperature-sensitive radio transmitter that is ingested), IRT = infrared thermography (used for skin temperature unless otherwise stated), ECG = electrocardiogram (heart rate), HF = heat flux sensor, TR = thermistor (temperature location specified), TC = thermocouple (temperature location specified); (2) behavior: TDR = time-depth recorder (diving behavior), SAT = satellite tag (location/movement data), GPS = global positioning satellite tag (location/movement data), VHF = very high frequency transmitter (location/movement data), CTD = conductivity-temperature-depth tag (*in situ* water temperature).

| Publication      |                                                         |                                                                                                                      |                                                | Study Setting |          |              | Animal State |         |            |             |         |         |            | Biotelemetry |                                                                                       | Notes |
|------------------|---------------------------------------------------------|----------------------------------------------------------------------------------------------------------------------|------------------------------------------------|---------------|----------|--------------|--------------|---------|------------|-------------|---------|---------|------------|--------------|---------------------------------------------------------------------------------------|-------|
| Publication      | Title                                                   | Year                                                                                                                 | Field                                          | Lab           | Modeling | Free-ranging | Trained      | Captive | Restrained | Peri-mortem | Carcass | Ex vivo | Physiology | Behavior     | Notes                                                                                 |       |
| <b>1940-1949</b> |                                                         |                                                                                                                      |                                                |               |          |              |              |         |            |             |         |         |            |              |                                                                                       |       |
| 1                | Scholander, PF; Irving, Laurence; Grinnell, SW          | On the Temperature and Metabolism of the seal during diving                                                          | Journal of Cellular and Comparative Physiology | 1942          |          | X            |              |         |            | X           |         |         |            |              | diving physiology study                                                               |       |
| 2                | Parry, DA;                                              | The structure of whale blubber, and a discussion of its thermal properties                                           | Journal of Cell Science                        | 1949          |          | X            |              |         |            |             |         | X       |            |              |                                                                                       |       |
| <b>1950-1959</b> |                                                         |                                                                                                                      |                                                |               |          |              |              |         |            |             |         |         |            |              |                                                                                       |       |
| 3                | Scholander, PF; Schevill, WE                            | Counter-Current Vascular Heat Exchange in the Fins of Whales                                                         | Journal of Applied Physiology                  | 1955          |          | X            |              |         |            |             |         | X       |            |              |                                                                                       |       |
| 4                | Bartholomew, GA; Wilke, F                               | Body temperature in the northern fur seal, <i>Callorhinus ursinus</i>                                                | Journal of Mammalogy                           | 1956          | X        |              |              |         | X          | X           |         |         |            |              | on land                                                                               |       |
| 5                | Irving, L; Hart, JS                                     | The metabolism and insulation of seals as bare-skinned mammals in cold water                                         | Canadian Journal of Zoology                    | 1957          |          | X            |              |         | X          |             |         |         |            |              |                                                                                       |       |
| 6                | Hart, JS; Irving, L                                     | The energetics of harbor seals in air and in water with special consideration of seasonal changes                    | Canadian Journal of Zoology                    | 1959          |          | X            |              |         | X          |             |         |         |            |              |                                                                                       |       |
| <b>1960-1969</b> |                                                         |                                                                                                                      |                                                |               |          |              |              |         |            |             |         |         |            |              |                                                                                       |       |
| 7                | Irving, L; Peyton, LJ; Bahn, CH; Peterson, RS           | Regulation of temperature in fur seals                                                                               | Physiological Zoology                          | 1962          | X        | X            |              |         | X          | X           |         |         |            |              |                                                                                       |       |
| 8                | Bryden, MM                                              | Insulating capacity of the subcutaneous fat of the southern elephant seal                                            | Nature                                         | 1964          |          | X            |              |         |            |             |         | X       |            |              |                                                                                       |       |
| 9                | Ling, JK                                                | Functional significance of sweat glands and sebaceous glands in seals                                                | Nature                                         | 1965          |          | X            |              |         |            |             |         | X       |            |              |                                                                                       |       |
| 10               | Ling, JK                                                | The skin and hair of the Southern Elephant Seal <i>Mirounga leonina</i> (L.) III. morphology of the adult integument | Australian Journal of Zoology                  | 1968          |          | X            |              |         |            |             |         | X       |            |              |                                                                                       |       |
| <b>1970-1979</b> |                                                         |                                                                                                                      |                                                |               |          |              |              |         |            |             |         |         |            |              |                                                                                       |       |
| 11               | Tarasoff, FJ; Fisher, HD                                | Anatomy of the hind flippers of two species of seals with reference to thermoregulation                              | Canadian Journal of Zoology                    | 1970          |          | X            |              |         |            |             |         | X       |            |              |                                                                                       |       |
| 12               | Hampton, IFG; Whittow, GC; Szekerczes, J; Rutherford, S | Heat transfer and body temperature in the Atlantic bottlenosed dolphin, <i>Tursiops truncatus</i>                    | The International Journal of Biometerology     | 1971          |          | X            |              |         | X          |             |         |         | X          |              | STP                                                                                   |       |
| 13               | McGinnis, SM; Southworth, TP                            | Thermoregulation in the northern elephant seal, <i>Mirounga angustirostris</i>                                       | Comparative Biochemistry and Physiology        | 1971          | X        | X            |              | X       | X          |             |         |         | X          |              | STP, implanted radio telemeters (T <sub>subcutaneous</sub> ), field component on land |       |
| 14               | White, FN; Odell, DK                                    | Thermoregulatory behavior of the northern elephant seal, <i>Mirounga angustirostris</i>                              | Journal of Mammalogy                           | 1971          | X        |              |              | X       |            |             |         |         | X          |              | STP, on land                                                                          |       |

## Supplementary File

| Publication |                                                                          |                                                                                                            |                                                            | Study Setting |     |          | Animal State |         |         |            |             |         |         | Biotelemetry |          | Notes                                                        |
|-------------|--------------------------------------------------------------------------|------------------------------------------------------------------------------------------------------------|------------------------------------------------------------|---------------|-----|----------|--------------|---------|---------|------------|-------------|---------|---------|--------------|----------|--------------------------------------------------------------|
|             | Publication                                                              | Title                                                                                                      | Year                                                       | Field         | Lab | Modeling | Free-ranging | Trained | Captive | Restrained | Peri-mortem | Carcass | Ex vivo | Physiology   | Behavior |                                                              |
| 15          | McGinnis, SM; Whittow, GC; Ohata, CA; Huber, H                           | Body heat dissipation and conservation in two species of dolphins                                          | Comparative Biochemistry and Physiology Part A: Physiology | 1972          |     | X        |              |         | X       |            |             |         |         | X            |          | STP, implanted radio telemeters (T <sub>subcutaneous</sub> ) |
| 16          | Ohata, CA; Matsuura, DT; Whittow, GC; Tinker, SW                         | Diurnal Rhythm of Body Temperature in the Hawaiian Monk Seal ( <i>Monachus schauinslandi</i> )             | Pacific Science                                            | 1972          |     | X        |              |         | X       |            |             |         |         | X            |          | STP                                                          |
| 17          | Whittow, GC; Matsuura, DT; Lin, YC                                       | Temperature regulation in the California sea lion ( <i>Zalophus californianus</i> )                        | Physiological Zoology                                      | 1972          |     | X        |              |         |         |            |             |         | X       |              |          |                                                              |
| 18          | Gentry, RL                                                               | Thermoregulatory behavior of eared seals                                                                   | Behaviour                                                  | 1973          | X   |          | X            |         |         |            |             |         |         |              |          | on land                                                      |
| 19          | Matsuura, DT; Whittow, GC                                                | Evaporative heat loss in the California sea lion and harbor seal                                           | Comparative Biochemistry and Physiology Part A: Physiology | 1974          |     | X        |              |         | X       | X          |             |         |         | X            |          | rectal telemetry capsule                                     |
| 20          | Morrison, P; Rosenmann, M; Estes, JA                                     | Metabolism and thermoregulation in the sea otter                                                           | Physiological Zoology                                      | 1974          |     | X        |              |         | X       | X          |             |         |         |              |          |                                                              |
| 21          | Odell, DK                                                                | Behavioral thermoregulation in the California sea lion                                                     | Behavioral Biology                                         | 1974          | X   |          | X            |         |         |            |             |         |         |              |          | on land                                                      |
| 22          | Ohata, CA; Whittow, GC                                                   | Conductive heat loss to sand in California sea lions and a harbor seal                                     | Comparative Biochemistry and Physiology                    | 1974          |     | X        |              |         | X       |            |             |         |         |              |          |                                                              |
| 23          | Whittow, GC; Hampton, IFG; Matsuura, DT; Ohata, CA; Smith, RM; Allen, JF | Body Temperature of Three Species of Whales                                                                | Journal of Mammalogy                                       | 1974          |     | X        |              |         | X       |            |             |         |         | X            |          | STP, IRT                                                     |
| 24          | Luecke, RH; Natarajan, V; South, RE                                      | A mathematical biothermal model of the California sea lion                                                 | Journal of Thermal Biology                                 | 1975          |     |          | X            |         |         |            |             |         |         |              |          |                                                              |
| 25          | McGinnis, SM                                                             | Peripheral Heat Exchange in Phocids                                                                        | Rapp. P.-v. Reun. Cons. int. Explor. Mer.                  | 1975          | X   | X        | X            |         | X       |            |             |         |         | X            |          | STP, field component performed on land                       |
| 26          | Miller, K; Irving, L                                                     | Metabolism and temperature regulation in young harbor seals <i>Phoca vitulina richardi</i>                 | American Journal of Physiology-Legacy Content              | 1975          |     | X        |              |         | X       |            |             |         |         |              |          |                                                              |
| 27          | Molyneux, GS; Bryden, MM                                                 | Arteriovenous anastomoses in the skin of the Weddell seal, <i>Leptonychotes weddelli</i>                   | Science                                                    | 1975          |     | X        |              |         |         |            |             |         | X       |              |          |                                                              |
| 28          | Whittow, GC; Szekerczes, J; Kridler, E; Olsen, DL                        | Skin structure of the Hawaiian monk seal ( <i>Monachus schauinslandi</i> )                                 | Pacific Science                                            | 1975          |     | X        |              |         |         |            |             |         | X       |              |          |                                                              |
| 29          | Hampton, IFG; Whittow, GC                                                | Body temperature and heat exchange in the Hawaiian spinner dolphin, <i>Stenella longirostris</i>           | Comparative Biochemistry and Physiology Part A: Physiology | 1976          |     | X        |              | X       | X       |            |             |         |         | X            |          | IRT                                                          |
| 30          | Miller, K; Rosenmann, M; Morrison, P                                     | Oxygen uptake and temperature regulation of young harbor seals ( <i>Phoca vitulina richardi</i> ) in water | Comparative Biochemistry and Physiology Part A: Physiology | 1976          |     | X        |              |         | X       |            |             |         |         |              |          |                                                              |

Supplementary File

| Publication      |                                                                                        |                                                                                                                                                                                        |      | Study Setting |     |          | Animal State |         |         |            |             |         |         | Biotelemetry |          | Notes |                                                              |
|------------------|----------------------------------------------------------------------------------------|----------------------------------------------------------------------------------------------------------------------------------------------------------------------------------------|------|---------------|-----|----------|--------------|---------|---------|------------|-------------|---------|---------|--------------|----------|-------|--------------------------------------------------------------|
|                  | Publication                                                                            | Title                                                                                                                                                                                  | Year | Field         | Lab | Modeling | Free-ranging | Trained | Captive | Restrained | Peri-mortem | Carcass | Ex vivo | Physiology   | Behavior |       |                                                              |
| 31               | Hammel, HT; Elsner, RW; Heller, HC; Maggert, JA; Bainton, CR                           | Thermoregulatory responses to altering hypothalamic temperature in the harbor seal                                                                                                     | 1977 |               | X   |          |              |         |         | X          |             |         |         |              |          |       |                                                              |
| 32               | Ohata, CA; Miller, LK                                                                  | Northern fur seal thermoregulation: Thermal responses to forced activity on land                                                                                                       | 1977 | X             |     |          |              |         |         |            | X           |         |         |              |          |       | on land                                                      |
| 33               | Ohata, CA; Miller, LK                                                                  | Some temperature responses of northern fur seal ( <i>Callorhinus ursinus</i> ) pups                                                                                                    | 1977 | X             |     |          |              |         |         | X          |             |         |         |              |          |       | on land                                                      |
| 34               | Ohata, CA; Miller, LK; Kajimura, H                                                     | Northern fur seal thermoregulation: Thermal responses to pelagic conditions                                                                                                            | 1977 | X             |     |          |              |         |         |            | X           |         |         |              |          |       | in water                                                     |
| 35               | Bryden, MM; Molyneux, GS                                                               | Arteriovenous anastomoses in the skin of seals. II. The California sea lion <i>Zalophus californianus</i> and the northern fur seal <i>Callorhinus ursinus</i> (Pinnipedia: Otariidae) | 1978 |               | X   |          |              |         |         |            |             |         | X       |              |          |       |                                                              |
| 36               | Molyneux, GS; Bryden, MM                                                               | Arteriovenous anastomoses in the skin of seals. I. The Weddell Seal <i>Leptonychotes weddelli</i> and the Elephant Seal <i>Mirounga leonina</i> (Pinnipedia: Phocidae)                 | 1978 |               | X   |          |              |         |         |            |             |         | X       |              |          |       |                                                              |
| 37               | Øritsland, NA; Ronald, K                                                               | Aspects of temperature regulation in harp seal pups evaluated by in vivo experiments and computer simulations                                                                          | 1978 |               | X   | X        |              |         |         | X          |             |         |         |              |          |       |                                                              |
| 38               | Blix, AS; Grav, H; Ronald, K                                                           | Some aspects of temperature regulation in newborn harp seal pups                                                                                                                       | 1979 |               | X   |          |              |         |         |            |             |         | X       |              |          |       |                                                              |
| 39               | Blix, AS; Miller, LK; Keyes, MC; Grav, HJ; Elsner, R                                   | Newborn northern fur seals ( <i>Callorhinus ursinus</i> )--do they suffer from cold?                                                                                                   | 1979 |               | X   |          |              |         | X       | X          |             | X       | X       |              |          |       |                                                              |
| 40               | Gallivan, GJ; Ronald, K                                                                | Temperature regulation in freely diving harp seals ( <i>Phoca groenlandica</i> )                                                                                                       | 1979 |               | X   |          |              |         | X       |            |             |         |         | X            |          |       | STP, diving physiology study                                 |
| 41               | Zapol, WM; Liggins, GC; Schneider, RC; Qvist, J; Snider, MT; Creasy, RK; Hochachka, PW | Regional blood flow during simulated diving in the conscious Weddell seal                                                                                                              | 1979 |               | X   |          |              |         |         | X          |             |         |         |              |          |       | diving physiology study                                      |
| <b>1980-1989</b> |                                                                                        |                                                                                                                                                                                        |      |               |     |          |              |         |         |            |             |         |         |              |          |       |                                                              |
| 42               | Kooyman, GL; Wahrenbrock, EA; Castellini, MA; Davis, RW; Sinnott, EE                   | Aerobic and anaerobic metabolism during voluntary diving in Weddell seals: Evidence of preferred pathways from blood chemistry and behavior                                            | 1980 | X             |     |          | X            |         |         | X          |             |         |         |              | X        |       | TDR, diving physiology study, in water                       |
| 43               | Costa, DP; Kooyman, GL                                                                 | Oxygen consumption, thermoregulation, and the effect of fur oiling and washing on the sea otter, <i>Enhydra lutris</i>                                                                 | 1982 |               | X   |          |              |         | X       |            |             |         | X       | X            |          |       | STP, implanted radio telemeters (T <sub>subcutaneous</sub> ) |

Supplementary File

| Publication      |                                                                                                                                        |                                                                                                                                                          |                                                                                   | Study Setting |     |          | Animal State |         |         |            |             |         |         | Biotelemetry |          | Notes                                                                                                             |
|------------------|----------------------------------------------------------------------------------------------------------------------------------------|----------------------------------------------------------------------------------------------------------------------------------------------------------|-----------------------------------------------------------------------------------|---------------|-----|----------|--------------|---------|---------|------------|-------------|---------|---------|--------------|----------|-------------------------------------------------------------------------------------------------------------------|
|                  | Publication                                                                                                                            | Title                                                                                                                                                    | Year                                                                              | Field         | Lab | Modeling | Free-ranging | Trained | Captive | Restrained | Peri-mortem | Carcass | Ex vivo | Physiology   | Behavior |                                                                                                                   |
| 44               | Blix, AA; Fay, FH; Ronald, K                                                                                                           | On testicular cooling in phocid seals                                                                                                                    | Polar Research                                                                    | 1983          | X   | X        |              |         |         |            | X           | X       |         |              |          | field component on land                                                                                           |
| 45               | Gallivan, GJ; Best, RC; Kanwisher, JW                                                                                                  | Temperature regulation in the Amazonian manatee <i>Trichechus inunguis</i>                                                                               | Physiological Zoology                                                             | 1983          |     | X        |              |         | X       |            |             |         |         | X            |          | STP                                                                                                               |
| 46               | Irvine, AB                                                                                                                             | Manatee metabolism and its influence on distribution in Florida                                                                                          | Biological Conservation                                                           | 1983          |     | X        |              |         | X       |            |             |         |         | X            |          | STP                                                                                                               |
| 47               | Costa, DP; Kooyman, GL                                                                                                                 | Contribution of specific dynamic action to heat balance and thermoregulation in the sea otter <i>Enhydra lutris</i>                                      | Physiological Zoology                                                             | 1984          |     | X        |              |         | X       |            |             |         |         |              |          |                                                                                                                   |
| 48               | Brodie, P; Paasche, A                                                                                                                  | Thermoregulation and energetics of fin and sei whales based on postmortem, stratified temperature measurements                                           | Canadian Journal of Zoology                                                       | 1985          | X   |          |              |         |         |            | X           |         |         |              |          | in water                                                                                                          |
| 49               | Limberger, D; Trillmich, F; Biebach, H; Stevenson, RD                                                                                  | Temperature regulation and microhabitat choice by free-ranging Galapagos fur seal pups ( <i>Arctocephalus galapagoensis</i> )                            | Oecologia                                                                         | 1986          | X   |          |              | X       |         |            |             |         |         | X            |          | STP, IRT, on land                                                                                                 |
| 50               | Yasui, WY; Gaskin, DE                                                                                                                  | Energy budget of a small cetacean, the harbour porpoise, <i>Phocoena phocoena</i> (L.)                                                                   | Ophelia                                                                           | 1986          |     | X        | X            |         |         |            |             |         | X       |              |          |                                                                                                                   |
| 51               | Folkow, LP; Blix, AS                                                                                                                   | Nasal heat and water exchange in gray seals                                                                                                              | American Journal of Physiology-Regulatory, Integrative and Comparative Physiology | 1987          |     | X        |              |         | X       |            |             |         |         |              |          |                                                                                                                   |
| 52               | Hill, RD; Schneider, RC; Liggins, GC; Schuette, AH; Elliott, RL; Guppy, M; Hochachka, PW; Qvist, J; Falke, KJ; Zapol, WM; Lig-Gins, GC | Heart rate and body temperature during free diving of Weddell seals                                                                                      | The American Physiological Society                                                | 1987          | X   |          |              |         |         |            | X           |         |         | X            | X        | ECG, blood samples, thermistor-tipped catheter (T <sub>blood</sub> ), TDR, VHF, diving physiology study, in water |
| 53               | Thompson, SD; Ono, KA; Oftedal, OT; Boness, DJ                                                                                         | Thermoregulation and resting metabolic rate of California sea lion ( <i>Zalophus californianus</i> ) pups                                                | Physiological Zoology                                                             | 1987          | X   |          |              |         |         | X          |             |         |         |              |          | on land                                                                                                           |
| 54               | Campagna, C; Le Boeuf, BJ                                                                                                              | Thermoregulatory behaviour of southern sea lions and its effect on mating strategies                                                                     | Behaviour                                                                         | 1988          | X   |          |              |         | X       |            |             |         |         |              |          | on land                                                                                                           |
| 55               | Ryg, M; Smith, TG; Øritsland, NA                                                                                                       | Thermal significance of the topographical distribution of blubber in ringed seals ( <i>Phoca hispida</i> )                                               | Canadian Journal of Fisheries and Aquatic Sciences                                | 1988          |     | X        |              |         |         |            | X           | X       | X       |              |          |                                                                                                                   |
| 56               | Folkow, LP; Blix, AS                                                                                                                   | Thermoregulatory control of expired air temperature in diving harp seals                                                                                 | American Journal of Physiology-Regulatory, Integrative and Comparative Physiology | 1989          |     | X        |              |         | X       | X          |             |         |         |              |          | diving physiology study                                                                                           |
| 57               | Kasting, NW; Adderley, SAL; Safford, T; Hewlett, KG                                                                                    | Thermoregulation in beluga ( <i>Delphinapterus leucas</i> ) and killer ( <i>Orcinus orca</i> ) whales                                                    | Physiological Zoology                                                             | 1989          |     | X        |              |         | X       |            |             |         |         |              |          |                                                                                                                   |
| <b>1990-1999</b> |                                                                                                                                        |                                                                                                                                                          |                                                                                   |               |     |          |              |         |         |            |             |         |         |              |          |                                                                                                                   |
| 58               | Doidge, DW                                                                                                                             | Integumentary heat loss and blubber distribution in the beluga, <i>Delphinapterus leucas</i> , with comparisons to the narwhal, <i>Monodon monoceros</i> | Canadian Bulletin of Fisheries and Aquatic Science                                | 1990          |     | X        |              |         |         |            |             | X       | X       |              |          |                                                                                                                   |

## Supplementary File

| Publication |                                                                       |                                                                                                                                                                                                 |                                                            |       | Study Setting |          |              | Animal State |         |            |             |         |         |            | Biotelemetry |  | Notes                                                                                     |
|-------------|-----------------------------------------------------------------------|-------------------------------------------------------------------------------------------------------------------------------------------------------------------------------------------------|------------------------------------------------------------|-------|---------------|----------|--------------|--------------|---------|------------|-------------|---------|---------|------------|--------------|--|-------------------------------------------------------------------------------------------|
|             | Publication                                                           | Title                                                                                                                                                                                           | Year                                                       | Field | Lab           | Modeling | Free-ranging | Trained      | Captive | Restrained | Peri-mortem | Carcass | Ex vivo | Physiology | Behavior     |  |                                                                                           |
| 59          | Hokkanen, JEI                                                         | Temperature regulation of marine mammals                                                                                                                                                        | Journal of Theoretical Biology                             | 1990  |               |          | X            |              |         |            |             |         |         |            |              |  |                                                                                           |
| 60          | Innes, S; Worthy, GAJ.; Lavigne, DM; Ronald, K                        | Surface area of phocid seals                                                                                                                                                                    | Canadian Journal of Zoology                                | 1990  |               | X        |              |              |         |            |             |         | X       |            |              |  |                                                                                           |
| 61          | Lavigne, DM; Innes, S; Worthy, GAJ; Edwards, EF                       | Lower critical temperatures of blue whales, <i>Balaenoptera musculus</i>                                                                                                                        | Journal of Theoretical Biology                             | 1990  |               |          | X            |              |         |            |             |         |         |            |              |  |                                                                                           |
| 62          | Øristland, NA; Markussen, NH                                          | Outline of a physiologically based model for population energetics                                                                                                                              | Ecological Modelling                                       | 1990  |               |          | X            |              |         |            |             |         |         |            |              |  |                                                                                           |
| 63          | Ryg, M; Lydersen, C; Markussen, NH; Smith, TG; Øritsland, NA          | Estimating the blubber content of phocid seals                                                                                                                                                  | Canadian Journal of Fisheries and Aquatic Sciences         | 1990  |               | X        |              |              |         |            |             | X       | X       |            |              |  |                                                                                           |
| 64          | Trites, AW                                                            | Thermal budgets and climate spaces: the impact of weather on the survival of Galapagos ( <i>Arctocephalus galapagoensis</i> Heller) and northern fur seal pups ( <i>Callorhinus ursinus</i> L.) | Functional Ecology                                         | 1990  |               |          | X            |              |         |            |             |         |         |            |              |  |                                                                                           |
| 65          | Worthy, GAJ; Edwards, EF                                              | Morphometric and biochemical factors affecting heat loss in a small temperate cetacean ( <i>Phocoena phocoena</i> ) and a small tropical cetacean ( <i>Stenella attenuata</i> )                 | Physiological Zoology                                      | 1990  |               | X        |              |              |         |            |             | X       | X       |            |              |  |                                                                                           |
| 66          | Francis, JM; Boness, DJ                                               | The effect of thermoregulatory behaviour on the mating system of the Juan Fernandez fur seal, <i>Arctocephalus philippii</i>                                                                    | Behaviour                                                  | 1991  | X             |          |              | X            |         |            |             |         |         |            |              |  | on land                                                                                   |
| 67          | Little, GJ                                                            | Thyroid morphology and function and its role in thermoregulation in the newborn southern elephant seal ( <i>Mirounga leonina</i> ) at Macquarie Island                                          | Journal of Anatomy                                         | 1991  | X             | X        |              |              |         | X          |             |         |         | X          |              |  | field component on land                                                                   |
| 68          | Smith, TG; Hammill, MO; Taugbøl, G                                    | A review of the developmental, behavioural and physiological adaptations of the ringed seal, <i>Phoca hispida</i> , to life in the Arctic winter                                                | Arctic                                                     | 1991  |               | X        |              |              |         | X          |             | X       | X       |            |              |  |                                                                                           |
| 69          | Worthy, GAJ                                                           | Insulation and thermal balance of fasting harp and grey seal pups                                                                                                                               | Comparative Biochemistry and Physiology Part A: Physiology | 1991  |               | X        |              |              | X       |            | X           |         | X       | X          |              |  | STP                                                                                       |
| 70          | Cuyler, LC; Wiulsrød, R; Øritsland, NA                                | Thermal infrared radiation from free living whales                                                                                                                                              | Marine Mammal Science                                      | 1992  | X             |          |              | X            |         |            |             |         |         | X          |              |  | IRT, in water                                                                             |
| 71          | Folkow, LP; Blix, AS                                                  | Metabolic rates of minke whales ( <i>Balaenoptera acutorostrata</i> ) in cold water                                                                                                             | Acta Physiologica Scandinavica                             | 1992  | X             | X        |              | X            |         |            | X           |         |         |            |              |  | field component in water                                                                  |
| 72          | Rommel, SA; Pabst, DA; McLellan, WA; Mead, JG; Potter, CW             | Anatomical evidence for a countercurrent heat exchanger associated with dolphin testes                                                                                                          | The Anatomical Record                                      | 1992  |               | X        |              |              |         |            |             | X       | X       |            |              |  |                                                                                           |
| 73          | Ponganis, PJ; Kooyman, GL; Castellini, MA; Ponganis, EP; Ponganis, KV | Muscle temperature and swim velocity profiles during diving in a Weddell seal, <i>Leptonychotes weddellii</i>                                                                                   | Journal of Experimental Biology                            | 1993  | X             |          |              | X            |         |            |             |         |         | X          | X            |  | percutaneous TR <sub>muscle</sub> , TDR, swim velocity, diving physiology study, in water |

## Supplementary File

| Publication |                                                                       |                                                                                                                                  |                                               |       | Study Setting |          |              | Animal State |         |            |             |         |         |            | Biotelemetry |                      | Notes |
|-------------|-----------------------------------------------------------------------|----------------------------------------------------------------------------------------------------------------------------------|-----------------------------------------------|-------|---------------|----------|--------------|--------------|---------|------------|-------------|---------|---------|------------|--------------|----------------------|-------|
|             | Publication                                                           | Title                                                                                                                            | Year                                          | Field | Lab           | Modeling | Free-ranging | Trained      | Captive | Restrained | Peri-mortem | Carcass | Ex vivo | Physiology | Behavior     |                      |       |
| 74          | Rommel, SA; Pabst, DA; McLellan, WA                                   | Functional morphology of the vascular plexuses associated with the cetacean uterus                                               | The Anatomical Record                         | 1993  |               | X        |              |              |         |            |             | X       | X       |            |              |                      |       |
| 75          | Ryg, M; Lydersen, C; Knutsen, LØ; Bjørge, A; Smith, TG; Øritsland, NA | Scaling of insulation in seals and whales                                                                                        | Journal of Zoology                            | 1993  |               | X        |              |              |         |            |             | X       | X       |            |              |                      |       |
| 76          | Watts, P; Hansen, S; Lavigne, DM                                      | Models of heat loss by marine mammals: thermoregulation below the zone of irrelevance                                            | Journal of Theoretical Biology                | 1993  |               |          | X            |              |         |            |             |         |         |            |              |                      |       |
| 77          | Kvadsheim, PH; Folkow, LP; Blix, AS                                   | A new device for measurement of the thermal conductivity of fur and blubber                                                      | Journal of Thermal Biology                    | 1994  |               | X        |              |              |         |            |             |         | X       |            |              |                      |       |
| 78          | Rommel, SA; Pabst, DA; McLellan, WA; Williams, TM; Friedl, WA         | Temperature regulation of the testes of the bottlenose dolphin ( <i>Tursiops truncatus</i> ): evidence from colonic temperatures | Journal of Comparative Physiology B           | 1994  |               | X        |              | X            |         |            |             |         |         |            |              |                      |       |
| 79          | Beck, GG; Smith, TG                                                   | Distribution of blubber in the northwest Atlantic harp seal, <i>Phoca groenlandica</i>                                           | Canadian Journal of Zoology                   | 1995  |               | X        |              |              |         |            |             | X       | X       | X          |              |                      |       |
| 80          | Boily, P                                                              | Theoretical heat flux in water and habitat selection of phocid seals and beluga whales during the annual molt                    | Journal of Theoretical Biology                | 1995  |               |          | X            |              |         |            |             |         |         |            |              |                      |       |
| 81          | Hansen, S; Lavigne, DM; Innes, S                                      | Energy metabolism and thermoregulation in juvenile harbor seals ( <i>Phoca vitulina</i> ) in air                                 | Physiological Zoology                         | 1995  |               | X        |              |              | X       |            |             |         |         | X          |              | STP                  |       |
| 82          | Kastelein, RA; Van der Sijs, SJ; Staal, C; Nieuwstraten, SH           | Blubber thickness in harbour porpoises ( <i>Phocoena phocoena</i> )                                                              | Food Consumption and Growth of Marine Mammals | 1995  |               | X        |              |              | X       |            |             |         |         | X          |              | IRT                  |       |
| 83          | Little, GJ                                                            | Body temperature in the newborn southern elephant seal, <i>Mirounga leonina</i> , at Macquarie Island                            | Marine Mammal Science                         | 1995  | X             |          |              |              |         | X          |             |         |         |            |              | on land              |       |
| 84          | Pabst, DA; Rommel, SA; McLellan, WA; Williams, TM; Rowles, TK         | Thermoregulation of the intra-abdominal testes of the bottlenose dolphin ( <i>Tursiops truncatus</i> ) during exercise           | The Journal of Experimental Biology           | 1995  |               | X        |              | X            |         |            |             |         |         | X          |              | TC <sub>rectal</sub> |       |
| 85          | Rommel, SA; Early, GA; Matassa, KA; Pabst, DA; McLellan, WA           | Venous structures associated with thermoregulation of phocid seal reproductive organs                                            | The Anatomical Record                         | 1995  |               | X        |              |              |         |            |             | X       | X       |            |              |                      |       |
| 86          | Boily, P; Lavigne, DM                                                 | Thermoregulation of juvenile grey seals, <i>Halichoerus grypus</i> , in air                                                      | Canadian Journal of Zoology                   | 1996  |               | X        |              |              | X       |            |             |         |         | X          |              | STP                  |       |
| 87          | Kvadsheim, PH; Folkow, LP; Blix, AS                                   | Thermal conductivity of minke whale blubber                                                                                      | Journal of Thermal Biology                    | 1996  |               | X        |              |              |         |            |             |         | X       |            |              |                      |       |
| 88          | Hansen, S; Lavigne, DM                                                | Ontogeny of the thermal limits in the harbor seal ( <i>Phoca vitulina</i> )                                                      | Physiological Zoology                         | 1997  |               | X        |              |              | X       |            |             |         |         | X          |              | STP                  |       |
| 89          | Heyning, JE; Mead, JG                                                 | Thermoregulation in the mouths of feeding gray whales                                                                            | Science                                       | 1997  |               | X        |              |              |         |            |             |         | X       |            |              |                      |       |
| 90          | Hind, AT; Gurney, WS                                                  | The metabolic cost of swimming in marine homeotherms                                                                             | The Journal of Experimental Biology           | 1997  |               |          | X            |              |         |            |             |         |         |            |              |                      |       |
| 91          | Kastelein, RA; Koene, P; Nieuwstraten, SH; Labberté, S                | Skin surface temperature changes in a harbour porpoise ( <i>Phocoena phocoena</i> ) while on land                                | The Biology of the Harbour Porpoise           | 1997  |               | X        |              |              | X       |            |             |         |         | X          |              | IRT                  |       |

Supplementary File

| Publication      |                                                                      |                                                                                                                                                                   |                                                                                          | Study Setting |     |          | Animal State |         |         |            |             |         | Biotelemetry |            | Notes    |                                                                     |
|------------------|----------------------------------------------------------------------|-------------------------------------------------------------------------------------------------------------------------------------------------------------------|------------------------------------------------------------------------------------------|---------------|-----|----------|--------------|---------|---------|------------|-------------|---------|--------------|------------|----------|---------------------------------------------------------------------|
|                  | Publication                                                          | Title                                                                                                                                                             | Year                                                                                     | Field         | Lab | Modeling | Free-ranging | Trained | Captive | Restrained | Peri-mortem | Carcass | Ex vivo      | Physiology | Behavior |                                                                     |
| 92               | Kvadsheim, PH; Folkow, LP                                            | Blubber and flipper heat transfer in harp seals                                                                                                                   | Acta Physiologica Scandinavica                                                           | 1997          |     | X        | X            |         | X       |            |             |         | X            |            |          |                                                                     |
| 93               | Kvadsheim, PH; Gotaas, ARL; Folkow, LP; Blix, AS                     | An experimental validation of heat loss models for marine mammals                                                                                                 | Journal of Theoretical Biology                                                           | 1997          |     | X        | X            |         | X       |            | X           |         | X            |            |          |                                                                     |
| 94               | Rosen, DAS; Renouf, D                                                | Seasonal changes in blubber distribution in Atlantic harbor seals: indications of thermodynamic considerations                                                    | Marine Mammal Science                                                                    | 1997          |     | X        |              |         | X       |            |             |         |              |            |          |                                                                     |
| 95               | Hind, AT; Gurney, WSC                                                | Are there thermoregulatory constraints on the timing of pupping for harbour seals?                                                                                | Canadian Journal of Zoology                                                              | 1998          |     |          | X            |         |         |            |             |         |              |            |          |                                                                     |
| 96               | Koopman, HN                                                          | Topographical distribution of the blubber of harbor porpoises ( <i>Phocoena phocoena</i> )                                                                        | Journal of Mammalogy                                                                     | 1998          |     | X        |              |         |         |            |             | X       |              |            |          |                                                                     |
| 97               | Heath, ME; Ridgway, SH                                               | How dolphins use their blubber to avoid heat stress during encounters with warm water                                                                             | American Journal of Physiology-Regulatory, Integrative and Comparative Physiology        | 1999          |     | X        |              |         | X       |            |             |         |              | X          |          | HF, TC <sub>rectal</sub>                                            |
| 98               | Noren, DP; Williams, TM; Berry, P; Butler, E                         | Thermoregulation during swimming and diving in bottlenose dolphins, <i>Tursiops truncatus</i>                                                                     | Journal of Comparative Physiology B                                                      | 1999          | X   |          |              |         | X       |            |             |         |              |            |          | diving physiology study, in water                                   |
| 99               | Williams, TM; Noren, D; Berry, P; Estes, JA; Allison, C; Kirtland, J | The diving physiology of bottlenose dolphins ( <i>Tursiops truncatus</i> ). III. Thermoregulation at depth                                                        | Journal of Experimental Biology                                                          | 1999          | X   |          |              |         | X       |            |             |         |              | X          | X        | ECG, TDR, diving physiology study, in water                         |
| <b>2000-2009</b> |                                                                      |                                                                                                                                                                   |                                                                                          |               |     |          |              |         |         |            |             |         |              |            |          |                                                                     |
| 100              | Boily, P; Kvadsheim, PH; Folkow, LP                                  | Cutaneous heat flux models do not reliably predict metabolic rates of marine mammals                                                                              | Journal of Theoretical Biology                                                           | 2000          |     | X        | X            |         |         | X          |             | X       | X            |            |          |                                                                     |
| 101              | Boyd, IL                                                             | Skin temperatures during free-ranging swimming and diving in Antarctic fur seals                                                                                  | Journal of Experimental Biology                                                          | 2000          | X   |          | X            | X       |         |            |             |         |              | X          | X        | $\Delta T_{R_{skin-water}}$ , TDR, field component in water         |
| 102              | Donohue, MJ; Costa, DP; Goebel, ME; Baker, JD                        | The ontogeny of metabolic rate and thermoregulatory capabilities of northern fur seal, <i>Callorhinus ursinus</i> , pups in air and water                         | Journal of Experimental Biology                                                          | 2000          | X   |          |              |         |         | X          |             |         |              |            |          | on land and in water                                                |
| 103              | Mauck, B; Eysel, U; Dehnhardt, G                                     | Selective heating of vibrissal follicles                                                                                                                          | Journal of Experimental Biology                                                          | 2000          |     | X        |              |         | X       |            |             |         |              | X          |          | IRT (vibrissal pad)                                                 |
| 104              | Heyning, JE                                                          | Thermoregulation in feeding baleen whales: Morphological and physiological evidence                                                                               | Aquatic Mammals                                                                          | 2001          |     | X        |              |         | X       |            |             |         |              | X          |          | IRT (tongue)                                                        |
| 105              | Jobsis, PD; Ponganis, PJ; Kooyman, GL                                | Effects of training on forced submersion responses in harbor seals                                                                                                | Journal of Experimental Biology                                                          | 2001          |     | X        |              |         | X       | X          |             |         |              | X          |          | ECG, muscle blood flow (via laser Doppler), diving physiology study |
| 106              | Rommel, SA; Pabst, DA; McLellan, WA                                  | Functional morphology of venous structures associated with the male and female reproductive systems in Florida manatees ( <i>Trichechus manatus latirostris</i> ) | The Anatomical Record: An Official Publication of the American Association of Anatomists | 2001          |     | X        |              |         |         |            |             |         | X            |            |          |                                                                     |

## Supplementary File

| Publication |                                                                               |                                                                                                                                                                                                    |      | Study Setting |     |          | Animal State |         |         |            |             |         |         | Biotelemetry |          | Notes                                               |
|-------------|-------------------------------------------------------------------------------|----------------------------------------------------------------------------------------------------------------------------------------------------------------------------------------------------|------|---------------|-----|----------|--------------|---------|---------|------------|-------------|---------|---------|--------------|----------|-----------------------------------------------------|
|             | Publication                                                                   | Title                                                                                                                                                                                              | Year | Field         | Lab | Modeling | Free-ranging | Trained | Captive | Restrained | Peri-mortem | Carcass | Ex vivo | Physiology   | Behavior |                                                     |
| 107         | Koopman, HN; Pabst, DA; McLellan, WA; Dillaman, RM; Read, AJ                  | Changes in blubber distribution and morphology associated with starvation in the harbor porpoise ( <i>Phocoena phocoena</i> ): evidence for regional differences in blubber structure and function | 2002 |               | X   |          |              |         |         |            |             | X       | X       |              |          |                                                     |
| 108         | Kvadshheim, PH; Aarseth, JJ                                                   | Thermal function of phocid seal fur                                                                                                                                                                | 2002 |               | X   |          |              |         |         |            |             |         | X       |              |          |                                                     |
| 109         | Meagher, EM; McLellan, WA; Westgate, AJ; Wells, RS; Frierson Jr, D; Pabst, DA | The relationship between heat flow and vasculature in the dorsal fin of wild bottlenose dolphins <i>Tursiops truncatus</i>                                                                         | 2002 | X             |     |          |              |         |         | X          |             |         |         | X            |          | ECG, HF with integrated TC <sub>skin</sub> in water |
| 110         | Noren, DP                                                                     | Thermoregulation of weaned northern elephant seal ( <i>Mirounga angustirostris</i> ) pups in air and water                                                                                         | 2002 |               | X   |          |              |         | X       |            |             |         |         |              |          |                                                     |
| 111         | Twiss, SD; Wright, NC; Dunstone, N; Redman, P; Moss, S; Pomeroy, PP           | Behavioral evidence of thermal stress from overheating in UK breeding gray seals                                                                                                                   | 2002 | X             |     |          | X            |         |         |            |             |         |         |              |          | in water                                            |
| 112         | Mauck, B; Bilgmann, K; Jones, DD; Eysel, U; Dehnhardt, G                      | Thermal windows on the trunk of hauled-out seals: hot spots for thermoregulatory evaporation?                                                                                                      | 2003 |               | X   |          |              | X       | X       |            |             |         |         | X            |          | IRT                                                 |
| 113         | Rommel, SA; Caplan, H                                                         | Vascular adaptations for heat conservation in the tail of Florida manatees ( <i>Trichechus manatus latirostris</i> )                                                                               | 2003 |               | X   |          |              |         |         |            |             | X       | X       |              |          |                                                     |
| 114         | Rosen, DAS; Trites, AW                                                        | No evidence for bioenergetic interaction between digestion and thermoregulation in Steller sea lions <i>Eumetopias jubatus</i>                                                                     | 2003 |               | X   |          |              | X       |         |            |             |         |         |              |          |                                                     |
| 115         | Elsner, R; George, JC; O'hara, T                                              | Vasomotor responses of isolated peripheral blood vessels from bowhead whales: thermoregulatory implications                                                                                        | 2004 |               | X   |          |              |         |         |            |             |         | X       |              |          |                                                     |
| 116         | Elsner, R; Meiselman, HJ; Baskurt, OK                                         | Temperature-viscosity relations of bowhead whale blood: A possible mechanism for maintaining cold blood flow                                                                                       | 2004 |               | X   |          |              |         |         |            |             |         | X       |              |          |                                                     |
| 117         | Ortiz, RM; Worthy, GAJ                                                        | Could lower body fat mass contribute to cold-water susceptibility in calves of the West Indian manatee ( <i>Trichechus manatus</i> )?                                                              | 2004 |               | X   |          |              |         | X       |            |             |         |         |              |          |                                                     |
| 118         | Rutishauser, MR; Costa, DP; Goebel, ME; Williams, TM                          | Ecological implications of body composition and thermal capabilities in young Antarctic fur seals ( <i>Arctocephalus gazella</i> )                                                                 | 2004 | X             |     | X        |              |         |         | X          |             |         |         |              |          | field component on land and in water                |
| 119         | Samuel, AM; Worthy GAJ                                                        | Variability in fatty acid composition of bottlenose dolphin ( <i>Tursiops truncatus</i> ) blubber as a function of body site, season, and reproductive state                                       | 2004 |               | X   |          |              |         |         |            |             |         | X       |              |          |                                                     |
| 120         | Silva, RG                                                                     | Assessment of body surface temperature in cetaceans: an iterative approach                                                                                                                         | 2004 |               |     | X        |              |         |         |            |             |         |         |              |          |                                                     |
| 121         | Struntz, DJ; McLellan, WA; Dillaman, RM; Blum, JE; Kucklick, JR; Pabst, DA    | Blubber development in bottlenose dolphins ( <i>Tursiops truncatus</i> )                                                                                                                           | 2004 |               | X   |          |              |         |         |            |             | X       | X       |              |          |                                                     |



Supplementary File

| Publication |                                                                                          |                                                                                                                                                    |      | Study Setting |     |          | Animal State |         |         |            |             |         | Biotelemetry |            | Notes    |                                                                                              |
|-------------|------------------------------------------------------------------------------------------|----------------------------------------------------------------------------------------------------------------------------------------------------|------|---------------|-----|----------|--------------|---------|---------|------------|-------------|---------|--------------|------------|----------|----------------------------------------------------------------------------------------------|
|             | Publication                                                                              | Title                                                                                                                                              | Year | Field         | Lab | Modeling | Free-ranging | Trained | Captive | Restrained | Peri-mortem | Carcass | Ex vivo      | Physiology | Behavior |                                                                                              |
| 122         | Bossart, GD; Meisner, RA; Rommel, SA; Ghim, S-J; Jensen, AB                              | Pathological features of the Florida manatee cold stress syndrome                                                                                  | 2005 |               | X   |          |              |         |         |            |             | X       |              |            |          |                                                                                              |
| 123         | Dunkin, RC; McLellan, WA; Blum, JE; Pabst, DA                                            | The ontogenetic changes in the thermal properties of blubber from Atlantic bottlenose dolphin <i>Tursiops truncatus</i>                            | 2005 |               | X   |          |              |         |         |            |             | X       | X            |            |          |                                                                                              |
| 124         | Harding, KC; Fujiwara, M; Axberg, Y; Härkönen, T                                         | Mass-dependent energetics and survival in harbour seal pups                                                                                        | 2005 | X             |     | X        |              |         |         | X          |             |         |              |            |          | field component on land                                                                      |
| 125         | Kvadsheim, PH; Folkow, LP; Blix, AS                                                      | Inhibition of shivering in hypothermic seals during diving                                                                                         | 2005 |               | X   |          |              | X       |         | X          |             |         |              | X          |          | EMG, TC <sub>brain</sub> , TC <sub>rectal</sub> , diving physiology study                    |
| 126         | McCafferty, DJ; Moss, S; Bennett, K; Pomeroy, PP                                         | Factors influencing the radiative surface temperature of grey seal ( <i>Halichoerus grypus</i> ) pups during early and late lactation              | 2005 | X             |     |          |              |         |         | X          |             |         |              | X          |          | IRT (rectal), on land                                                                        |
| 127         | Rotherham, LS; van Der Merwe, M; Bester, MN; Oosthuizen, WH                              | Morphology and distribution of sweat glands in the Cape fur seal, <i>Arctocephalus pusillus pusillus</i> (Carnivora: Otariidae)                    | 2005 |               | X   |          |              |         |         |            |             |         | X            |            |          |                                                                                              |
| 128         | Thornton, SJ; Hochachka, PW; Crocker, DE; Costa, DP; LeBoeuf, BJ; Spielman, DM; Pelc, NJ | Stroke volume and cardiac output in juvenile elephant seals during forced dives                                                                    | 2005 |               | X   |          |              |         |         | X          |             |         |              |            |          | diving physiology                                                                            |
| 129         | Willis, K; Horning, M                                                                    | A novel approach to measuring heat flux in swimming animals                                                                                        | 2005 | X             | X   |          | X            | X       |         |            |             |         |              | X          |          | HF with integrated TC <sub>skin</sub> , field component in water                             |
| 130         | Willis, K; Horning, M; Rosen, DAS; Trites, AW                                            | Spatial variation of heat flux in Steller sea lions: evidence for consistent avenues of heat exchange along the body trunk                         | 2005 |               | X   | X        |              | X       |         |            |             |         |              | X          | X        | HF with integrated TR <sub>skin</sub> , swim speed                                           |
| 131         | Beentjes, MP                                                                             | Behavioral thermoregulation of the New Zealand sea lion ( <i>Phocarctos hookeri</i> )                                                              | 2006 | X             |     |          | X            |         |         |            |             | X       |              |            |          |                                                                                              |
| 132         | Ponganis, PJ; Stockard, T; Knowler, Levenson, DH; Berg, L; Baranov, EA                   | Cardiac output and muscle blood flow during rest-associated apneas of elephant seals                                                               | 2006 |               | X   |          |              |         | X       |            |             |         |              | X          |          | muscle blood flow (via laser Doppler), ECG, thermistor-tipped catheter (T <sub>blood</sub> ) |
| 133         | Koopman, HN                                                                              | Phylogenetic, ecological, and ontogenetic factors influencing the biochemical structure of the blubber of odontocetes                              | 2007 |               | X   |          |              |         |         |            |             |         | X            |            |          |                                                                                              |
| 134         | Mellish, JE; Horning, M; York, AE                                                        | Seasonal and spatial blubber depth changes in captive harbor seals ( <i>Phoca vitulina</i> ) and Steller's sea lions ( <i>Eumetopias jubatus</i> ) | 2007 |               | X   |          |              | X       |         |            |             |         |              |            |          |                                                                                              |
| 135         | Werth, AJ                                                                                | Adaptations of the cetacean hyolingual apparatus for aquatic feeding and thermoregulation                                                          | 2007 |               | X   |          |              |         |         |            |             |         | X            |            |          |                                                                                              |

Supplementary File

| Publication      |                                                                                                            |                                                                                                                                                                                                           |                                                    |       | Study Setting |          |              | Animal State |         |            |             |         |         |            | Biotelemetry |   | Notes                                                                                                             |
|------------------|------------------------------------------------------------------------------------------------------------|-----------------------------------------------------------------------------------------------------------------------------------------------------------------------------------------------------------|----------------------------------------------------|-------|---------------|----------|--------------|--------------|---------|------------|-------------|---------|---------|------------|--------------|---|-------------------------------------------------------------------------------------------------------------------|
|                  | Publication                                                                                                | Title                                                                                                                                                                                                     | Year                                               | Field | Lab           | Modeling | Free-ranging | Trained      | Captive | Restrained | Peri-mortem | Carcass | Ex vivo | Physiology | Behavior     |   |                                                                                                                   |
| 136              | Westgate, AJ; McLellan, WA; Wells, RS; Scott, MD; Meagher, EM; Pabst, DA                                   | A new device to remotely measure heat flux and skin temperature from free-swimming dolphins                                                                                                               | Journal of Experimental Marine Biology and Ecology | 2007  | X             |          |              | X            |         |            |             |         |         |            | X            | X | HF with integrated TR <sub>skin</sub> , swim velocity, TDR, VHF, in water                                         |
| 137              | Hasselberg, BA; Thomas, JA                                                                                 | Using an infrared temperature sensor to study microhabitat selection in captive California Sea Lions ( <i>Zalophus californianus</i> )                                                                    | Aquatic Mammals                                    | 2008  |               | X        |              |              | X       |            |             |         |         |            | X            |   | IRT                                                                                                               |
| 138              | Meagher, EM; McLellan, WA; Westgate, AJ; Wells, RS; Blum, JE; Pabst, DA                                    | Seasonal patterns of heat loss in wild bottlenose dolphins ( <i>Tursiops truncatus</i> )                                                                                                                  | Journal of Comparative Physiology B                | 2008  | X             |          |              |              |         | X          |             |         |         |            | X            |   | HF with integrated TC <sub>skin</sub> , TC <sub>rectal</sub> , in water                                           |
| 139              | Montie, EW; Garvin, SR; Fair, PA; Bossart, GD; Mitchum, GB; McFee, WE; Speakman, T; Starczak, VR; Hahn, ME | Blubber morphology in wild bottlenose dolphins ( <i>Tursiops truncatus</i> ) from the Southeastern United States: influence of geographic location, age class, and reproductive state                     | Journal of Morphology                              | 2008  |               | X        |              |              |         |            |             |         | X       |            |              |   |                                                                                                                   |
| 140              | Noren, SR; Pearson, LE; Davis, J; Trumble, SJ; Kanatous, SB                                                | Different thermoregulatory strategies in nearly weaned pup, yearling, and adult Weddell seals ( <i>Leptonychotes weddelli</i> )                                                                           | Physiological and Biochemical Zoology              | 2008  | X             |          |              |              |         | X          |             |         |         |            |              |   | on land                                                                                                           |
| 141              | Ponganis, PJ; Kreutzer, U; Stockard, TK; Lin, P-C; Sailasuta, N; Tran, T-K; Hurd, R; Jue, T                | Blood flow and metabolic regulation in seal muscle during apnea                                                                                                                                           | Journal of Experimental Biology                    | 2008  |               | X        |              |              | X       |            |             |         |         |            | X            |   | muscle blood flow (via laser Doppler)                                                                             |
| 142              | Yeates, LC; Houser, DS                                                                                     | Thermal tolerance in bottlenose dolphins ( <i>Tursiops truncatus</i> )                                                                                                                                    | Journal of Experimental Biology                    | 2008  |               | X        |              |              | X       |            |             |         |         |            |              |   |                                                                                                                   |
| 143              | Castellini, MA; Trumble, SJ; Mau, TL; Yochem, PK; Stewart, BS; Koski, MA                                   | Body and blubber relationships in Antarctic pack ice seals: implications for blubber depth patterns                                                                                                       | Physiological and Biochemical Zoology              | 2009  | X             |          |              |              |         | X          |             |         |         |            |              |   | on land                                                                                                           |
| 144              | Hammill, MO; Ryg, M; Chabot, D                                                                             | Seasonal changes in energy requirements of harp seals                                                                                                                                                     | Journal of Northwest Atlantic Fishery Science      | 2009  |               |          | X            |              |         |            |             |         |         |            |              |   |                                                                                                                   |
| 145              | Liwanag, HEM; Williams, TM; Costa, DP; Kanatous, SB; Davis, RW; Boyd, IL                                   | The effects of water temperature on the energetic costs of juvenile and adult California sea lions ( <i>Zalophus californianus</i> ): the importance of skeletal muscle thermogenesis for thermal balance | Journal of Experimental Biology                    | 2009  |               | X        |              |              | X       |            |             |         |         |            | X            |   | STP                                                                                                               |
| 146              | Noren, SR; Wells, RS                                                                                       | Blubber deposition during ontogeny in free-ranging bottlenose dolphins: balancing disparate roles of insulation and locomotion                                                                            | Journal of Mammalogy                               | 2009  | X             |          |              |              |         | X          |             |         |         |            |              |   | in water                                                                                                          |
| <b>2010-2019</b> |                                                                                                            |                                                                                                                                                                                                           |                                                    |       |               |          |              |              |         |            |             |         |         |            |              |   |                                                                                                                   |
| 147              | Barbieri, MM; McLellan, WA; Wells, RS; Blum, JE; Hofmann, S; Gannon, J; Pabst, DA                          | Using infrared thermography to assess seasonal trends in dorsal fin surface temperatures of free-swimming bottlenose dolphins ( <i>Tursiops truncatus</i> ) in Sarasota Bay, Florida                      | Marine Mammal Science                              | 2010  | X             |          |              | X            |         |            |             |         |         |            | X            |   | IRT (dorsal fin), in water                                                                                        |
| 148              | Blix, AS; Walløe, L; Messelt, EB; Folkow, LP                                                               | Selective brain cooling and its vascular basis in diving seals                                                                                                                                            | Journal of Experimental Biology                    | 2010  |               | X        |              |              |         | X          |             |         | X       | X          |              |   | TC <sub>brain</sub> , TC <sub>blood</sub> , TC <sub>muscle</sub> , TC <sub>rectal</sub> , diving physiology study |

## Supplementary File

| Publication |                                                                                 |                                                                                                                                                                                     |      | Study Setting |     |          | Animal State |         |         |            |             |         | Biotelemetry |            | Notes    |                                                                                                   |  |
|-------------|---------------------------------------------------------------------------------|-------------------------------------------------------------------------------------------------------------------------------------------------------------------------------------|------|---------------|-----|----------|--------------|---------|---------|------------|-------------|---------|--------------|------------|----------|---------------------------------------------------------------------------------------------------|--|
|             | Publication                                                                     | Title                                                                                                                                                                               | Year | Field         | Lab | Modeling | Free-ranging | Trained | Captive | Restrained | Peri-mortem | Carcass | Ex vivo      | Physiology | Behavior |                                                                                                   |  |
| 149         | Liwanag, HEM                                                                    | Energetic costs and thermoregulation in northern fur seal ( <i>Callorhinus ursinus</i> ) pups: the importance of behavioral strategies for thermal balance in furred marine mammals | 2010 |               | X   |          |              | X       | X       |            |             |         |              |            |          |                                                                                                   |  |
| 150         | Meir, JU; Ponganis, PJ                                                          | Blood temperature profiles of diving elephant seals                                                                                                                                 | 2010 | X             |     |          | X            |         |         |            |             |         |              | X          | X        | P <sub>02</sub> electrode, TR <sub>blood</sub> , TDR, SAT, VHF, diving physiology study, in water |  |
| 151         | Nienaber, J; Thomson, H; Horning, M; Polasek, L; Mellish, J-A                   | Surface temperature patterns in seals and sea lions: a validation of temporal and spatial consistency                                                                               | 2010 |               | X   |          |              | X       |         |            |             |         |              | X          |          | IRT                                                                                               |  |
| 152         | Norris, AL; Houser, DS; Crocker, DE                                             | Environment and activity affect skin temperature in breeding adult male elephant seals ( <i>Mirounga angustirostris</i> )                                                           | 2010 | X             |     |          | X            |         |         |            |             |         |              | X          |          | IRT, on land                                                                                      |  |
| 153         | Houser, DS; Yeates, LC; Crocker, DE                                             | Cold stress induces an adrenocortical response in bottlenose dolphins ( <i>Tursiops truncatus</i> )                                                                                 | 2011 |               | X   |          |              | X       | X       |            |             |         |              |            |          |                                                                                                   |  |
| 154         | Bagge, LE; Koopman, HN; Rommel, SA; McLellan, WA; Pabst, DA                     | Lipid class and depth-specific thermal properties in the blubber of the short-finned pilot whale and the pygmy sperm whale                                                          | 2012 |               | X   |          |              |         |         |            |             |         | X            |            |          |                                                                                                   |  |
| 155         | Durban, JW; Pitman, RL                                                          | Antarctic killer whales make rapid, round-trip movements to subtropical waters: evidence for physiological maintenance migrations?                                                  | 2012 | X             |     |          | X            |         |         |            |             |         |              |            | X        | SAT, in water                                                                                     |  |
| 156         | Erdsack, N; Hanke, FD; Dehnhardt, G; Hanke, W                                   | Control and amount of heat dissipation through thermal windows in harbor seals ( <i>Phoca vitulina</i> )                                                                            | 2012 |               | X   | X        | X            | X       |         |            |             |         |              | X          |          | IRT                                                                                               |  |
| 157         | Khamas, WA; Smodlaka, H; Leach-Robinson, J; Palmer, L                           | Skin histology and its role in heat dissipation in three pinniped species                                                                                                           | 2012 |               | X   |          |              |         |         |            |             |         | X            |            |          |                                                                                                   |  |
| 158         | Liwanag, HEM; Berta, A; Costa, DP; Abney, M; Williams, TM                       | Morphological and thermal properties of mammalian insulation: the evolution of fur for aquatic living                                                                               | 2012 |               | X   |          |              |         |         |            |             |         | X            |            |          |                                                                                                   |  |
| 159         | Liwanag, HEM; Berta, A; Costa, DP; Budge, SM; Williams, TM                      | Morphological and thermal properties of mammalian insulation: the evolutionary transition to blubber in pinnipeds                                                                   | 2012 |               | X   |          |              |         |         |            |             |         | X            |            |          |                                                                                                   |  |
| 160         | McClelland, SJ; Gay, M; Pabst, DA; Dillaman, R; Westgate, AJ; Koopman, HN       | Microvascular patterns in the blubber of shallow and deep diving odontocetes                                                                                                        | 2012 |               | X   |          |              |         |         |            |             |         | X            |            |          |                                                                                                   |  |
| 161         | Mellish, J; Nienaber, J; Polasek, L; Horning, M                                 | Beneath the surface: Profiling blubber depth in pinnipeds with infrared imaging                                                                                                     | 2012 |               | X   |          |              | X       |         |            |             |         |              | X          |          | IRT                                                                                               |  |
| 162         | Paterson, W; Sparling, CE; Thompson, D; Pomeroy, PP; Currie, JI; McCafferty, DJ | Seals like it hot: Changes in surface temperature of harbour seals ( <i>Phoca vitulina</i> ) from late pregnancy to moult                                                           | 2012 |               | X   |          |              |         | X       |            |             |         |              | X          |          | IRT                                                                                               |  |

## Supplementary File

| Publication |                                                                                                 |                                                                                                                                                                                            |      | Study Setting |     |          | Animal State |         |         |            |             |         | Biotelemetry |            | Notes    |                              |
|-------------|-------------------------------------------------------------------------------------------------|--------------------------------------------------------------------------------------------------------------------------------------------------------------------------------------------|------|---------------|-----|----------|--------------|---------|---------|------------|-------------|---------|--------------|------------|----------|------------------------------|
|             | Publication                                                                                     | Title                                                                                                                                                                                      | Year | Field         | Lab | Modeling | Free-ranging | Trained | Captive | Restrained | Peri-mortem | Carcass | Ex vivo      | Physiology | Behavior |                              |
| 163         | Erdsack, N; Dehnhardt, G; Hanke, W                                                              | Coping with heat: function of the natal coat of Cape fur seal ( <i>Arctocephalus pusillus pusillus</i> ) pups in maintaining core body temperature                                         | 2013 |               | X   |          |              |         | X       | X          |             |         |              | X          |          | IRT                          |
| 164         | Ford Jr, TJ; Werth, AJ; George, JC                                                              | An intraoral thermoregulatory organ in the bowhead whale ( <i>Balaena mysticetus</i> ), the corpus cavernosum maxillarlis                                                                  | 2013 |               | X   |          |              |         |         |            |             |         | X            | X          |          | IRT (oral cavity)            |
| 165         | Rodríguez-Prieto, V; Rubio-García, A; Melero, M; García, D; Sánchez-Vizcaíno, JM                | Identification of the pattern of appearance and development of thermal windows in the skin of juvenile Pacific walruses ( <i>Odobenus rosmarus divergens</i> ) in a controlled environment | 2013 |               | X   |          |              | X       |         |            |             |         |              | X          |          | IRT                          |
| 166         | Dalton, AJM; Rosen, DAS; Trites, AW                                                             | Broad thermal capacity facilitates the primarily pelagic existence of northern fur seals ( <i>Callorhinus ursinus</i> )                                                                    | 2014 |               | X   |          |              | X       |         |            |             |         |              |            |          |                              |
| 167         | Erdsack, N; Dehnhardt, G; Hanke, W                                                              | Thermoregulation of the vibrissal system in harbor seals ( <i>Phoca vitulina</i> ) and Cape fur seals ( <i>Arctocephalus pusillus pusillus</i> )                                           | 2014 | X             |     |          |              | X       |         |            |             |         |              | X          |          | IRT (vibrissal pad), on land |
| 168         | Garlepp, L; Logan, M; Kirkwood, R                                                               | Behavioral responses of Australian fur seals ( <i>Arctocephalus pusillus doriferus</i> ) to environmental variations                                                                       | 2014 | X             |     |          | X            |         |         |            |             |         |              |            |          | on land                      |
| 169         | Horgan, P; Booth, D; Nichols, C; Lanyon, JM                                                     | Insulative capacity of the integument of the dugong ( <i>Dugong dugon</i> ): thermal conductivity, conductance and resistance measured by in vitro heat flux                               | 2014 |               | X   |          |              |         |         |            |             |         | X            |            |          |                              |
| 170         | Liwanag, HEM; Orazo, J; Costa, DP; Williams, TM                                                 | Thermal benefits of aggregation in a large marine endotherm: huddling in California sea lions                                                                                              | 2014 | X             |     |          | X            |         |         |            |             |         |              | X          |          | IRT, on land                 |
| 171         | Pearson, LE; Liwanag, HEM; Hammill, MO; Burns, JM                                               | Shifts in thermoregulatory strategy during ontogeny in harp seals ( <i>Pagophilus groenlandicus</i> )                                                                                      | 2014 |               | X   |          |              |         |         |            |             | X       | X            |            |          |                              |
| 172         | Pearson, LE; Liwanag, HEM; Hammill, MO; Burns, JM                                               | To each its own: Thermoregulatory strategy varies among neonatal polar phocids                                                                                                             | 2014 |               | X   |          |              |         |         |            |             | X       | X            |            |          |                              |
| 173         | Rosen, DAS; Trites, AW                                                                          | Thermal limits in young northern fur seals, <i>Callorhinus ursinus</i>                                                                                                                     | 2014 |               | X   |          |              | X       |         |            |             |         |              |            |          |                              |
| 174         | Ball, HC; Stavaz, M; Oldaker, J; Usip, S; Londraville, RL; George, JC; Thewissen, JGM; Duff, RJ | Seasonal and ontogenetic variation in subcutaneous adipose of the bowhead whale ( <i>Balaena mysticetus</i> )                                                                              | 2015 |               | X   |          |              |         |         |            |             |         | X            |            |          |                              |
| 175         | Ekdale, EG; Kienle, SS                                                                          | Passive Restriction of Blood Flow and Counter-Current Heat Exchange Via Lingual Retia in the Tongue of a Neonatal Gray Whale <i>Eschrichtius robustus</i> (Cetacea, Mysticeti)             | 2015 |               | X   |          |              |         |         |            |             | X       |              |            |          |                              |

## Supplementary File

| Publication |                                                                                                                   |                                                                                                                                                                |      | Study Setting |     |          | Animal State |         |         |            |             |         | Biotelemetry |            | Notes    |                                                                                                                                         |
|-------------|-------------------------------------------------------------------------------------------------------------------|----------------------------------------------------------------------------------------------------------------------------------------------------------------|------|---------------|-----|----------|--------------|---------|---------|------------|-------------|---------|--------------|------------|----------|-----------------------------------------------------------------------------------------------------------------------------------------|
|             | Publication                                                                                                       | Title                                                                                                                                                          | Year | Field         | Lab | Modeling | Free-ranging | Trained | Captive | Restrained | Peri-mortem | Carcass | Ex vivo      | Physiology | Behavior |                                                                                                                                         |
| 176         | Erdsack, N; Dehnhardt, G; Witt, M; Wree, A; Siebert, U; Hanke, W                                                  | Unique fur and skin structure in harbour seals ( <i>Phoca vitulina</i> )—thermal insulation, drag reduction, or both?                                          | 2015 |               | X   |          |              |         |         |            |             |         | X            |            |          |                                                                                                                                         |
| 177         | Gmuca, NV; Pearson, LE; Burns, JM; Liwanag, HEM                                                                   | The fat and the furriest: morphological changes in harp seal fur with ontogeny                                                                                 | 2015 |               | X   |          |              |         |         |            |             |         | X            |            |          |                                                                                                                                         |
| 178         | Gómez-Campos, E; Borrell, A; Correas, J; Aguilar, A                                                               | Topographical variation in lipid content and morphological structure of the blubber in the striped dolphin                                                     | 2015 |               | X   |          |              |         |         |            |             |         | X            |            |          |                                                                                                                                         |
| 179         | Hashimoto, O; Ohtsuki, H; Kakizaki, T; Amou, K; Sato, R; Doi, S; Kobayashi, S; Matsuda, A; Sugiyama, M; Funaba, M | Brown adipose tissue in cetacean blubber                                                                                                                       | 2015 |               | X   |          |              |         |         |            |             |         | X            |            |          |                                                                                                                                         |
| 180         | Hindle, AG; Horning, M; Mellish, JAE                                                                              | Estimating total body heat dissipation in air and water from skin surface heat flux telemetry in Weddell seals                                                 | 2015 | X             |     | X        | X            |         |         |            |             |         |              | X          | X        | STP, HF sensor with integrated thermistor (T <sub>skin</sub> ), IRT, TDR, accelerometer, SAT, VHF, field component on land and in water |
| 181         | Melero, M; Rodríguez-Prieto, V; Rubio-García, A; García-Párraga, D; Sánchez-Vizcaíno, JM                          | Thermal reference points as an index for monitoring body temperature in marine mammals                                                                         | 2015 |               | X   |          |              | X       |         |            |             |         |              | X          |          | IRT                                                                                                                                     |
| 182         | Mellish, J-A; Hindle, A; Skinner, J; Horning, M                                                                   | Heat loss in air of an Antarctic marine mammal, the Weddell seal                                                                                               | 2015 | X             |     | X        | X            |         |         | X          |             |         |              | X          |          | IRT, field component on land                                                                                                            |
| 183         | Noren, SR; Udevitz, MS; Triggs, L; Paschke, J; Oland, L; Jay, CV                                                  | Identifying a reliable blubber measurement site to assess body condition in a marine mammal with topographically variable blubber, the Pacific walrus          | 2015 |               | X   |          |              | X       |         |            |             |         |              |            |          |                                                                                                                                         |
| 184         | Sakurai, Y; Okamatsu-Ogura, Y; Saito, M; Kimura, K; Nakao, R; Ohnuma, A; Kobayashi, M                             | Brown adipose tissue expresses uncoupling protein 1 in newborn harbor seals ( <i>Phoca vitulina</i> )                                                          | 2015 |               | X   |          |              |         |         |            |             |         | X            |            |          |                                                                                                                                         |
| 185         | Zeng, X; Ji, J; Hao, Y; Wang, D                                                                                   | Topographical distribution of blubber in finless porpoises ( <i>Neophocaena asiaeorientalis sunameri</i> ): a result from adapting to living in coastal waters | 2015 |               | X   |          |              |         |         |            |             | X       | X            |            |          |                                                                                                                                         |
| 186         | Codde, SA; Allen, SG; Houser, DS; Crocker, DE                                                                     | Effects of environmental variables on surface temperature of breeding adult female northern elephant seals, <i>Mirounga angustirostris</i> , and pups          | 2016 | X             |     |          | X            |         |         |            |             |         |              | X          |          | IRT, on land                                                                                                                            |
| 187         | Cornick, LA; Quakenbush, LT; Norman, SA; Pasi, C; Maslyk, P; Burek, DA; Goertz, CEC; Hobbs, RC                    | Seasonal and developmental differences in blubber stores of beluga whales in Bristol Bay, Alaska using high-resolution ultrasound                              | 2016 | X             |     |          |              |         |         | X          |             | X       |              |            |          | in water                                                                                                                                |

Supplementary File

| Publication |                                                                                                                       |                                                                                                                                                                        |                                                    | Study Setting |     |          | Animal State |         |         |            |             |         |         | Biotelemetry |          | Notes                                                                  |
|-------------|-----------------------------------------------------------------------------------------------------------------------|------------------------------------------------------------------------------------------------------------------------------------------------------------------------|----------------------------------------------------|---------------|-----|----------|--------------|---------|---------|------------|-------------|---------|---------|--------------|----------|------------------------------------------------------------------------|
|             | Publication                                                                                                           | Title                                                                                                                                                                  | Year                                               | Field         | Lab | Modeling | Free-ranging | Trained | Captive | Restrained | Peri-mortem | Carcass | Ex vivo | Physiology   | Behavior |                                                                        |
| 188         | Beltran, RS; Testa, JW; Burns, JM                                                                                     | An agent-based bioenergetics model for predicting impacts of environmental change on a top marine predator, the Weddell seal                                           | Ecological Modelling                               | 2017          |     |          | X            |         |         |            |             |         |         |              |          |                                                                        |
| 189         | Ladds, MA; Slip, DJ; Harcourt, RG                                                                                     | Intrinsic and extrinsic influences on standard metabolic rates of three species of Australian otariid                                                                  | Conservation physiology                            | 2017          |     | X        |              | X       |         |            |             |         |         |              |          |                                                                        |
| 190         | Sharma, N; Liwanag, HEM                                                                                               | The effects of submergence on the thermal function of pinniped fur                                                                                                     | Marine Mammal Science                              | 2017          |     | X        |              |         |         |            |             |         | X       |              |          |                                                                        |
| 191         | Singleton, EM; McLellan, WA; Koopman, HN; Pokorny, A; Scharf, FS; Pabst, DA                                           | Lipid composition and thermal properties of the blubber of Gervais' beaked whale ( <i>Mesoplodon europaeus</i> ) across ontogeny                                       | Marine Mammal Science                              | 2017          |     | X        |              |         |         |            |             |         | X       |              |          |                                                                        |
| 192         | Chaise, LL; Prinnet, I; Toscani, C; Gallon, SL; Paterson, W; McCafferty, DJ; Théry, M; Ancel, A; Gilbert, C           | Local weather and body condition influence habitat use and movements on land of molting female southern elephant seals ( <i>Mirounga leonina</i> )                     | Ecology and Evolution                              | 2018          | X   |          |              | X       |         |            |             |         |         |              | X        | GPS, VHF, on land                                                      |
| 193         | Erdsack, N; Phillips, SRM; Rommel, SA; Pabst, DA; McLellan, WA; Reynolds, JE                                          | Heat flux in manatees: an individual matter and a novel approach to assess and monitor the thermal state of Florida manatees ( <i>Trichechus manatus latirostris</i> ) | Journal of Comparative Physiology B                | 2018          |     | X        |              |         | X       |            |             |         |         |              |          |                                                                        |
| 194         | García-Aguilar, AC; Turrent, C; Elorriaga-Verplancken, FR; Arias-Del-Razo, A; Schramm, Y                              | Climate change and the northern elephant seal ( <i>Mirounga angustirostris</i> ) population in Baja California, Mexico                                                 | PLoS ONE                                           | 2018          | X   |          |              | X       |         |            |             |         |         |              |          | on land                                                                |
| 195         | Krmpotic, CM; Loza, CM; Negrete, J; Scarano, AC; Carlini, AA; Guerrero, A; Barbeito, CG                               | Integument in Antarctic seals: a comparative study and its relation to extreme environments                                                                            | Acta Zoologica                                     | 2018          |     | X        |              |         |         |            |             |         | X       |              |          |                                                                        |
| 196         | Rojano-Doñate, L; McDonald, BI; Wisniewska, DM; Johnson, M; Teilmann, J; Wahlberg, M; Højer-Kristensen, J; Madsen, PT | High field metabolic rates of wild harbour porpoises                                                                                                                   | Journal of Experimental Biology                    | 2018          | X   | X        |              | X       | X       |            |             |         |         |              | X        | TDR, accelerometer, SAT, VHF, field component in water                 |
| 197         | Zeh, DR; Heupel, MR; Hamann, M; Jones, R; Limpus, CJ; Marsh, H                                                        | Evidence of behavioural thermoregulation by dugongs at the high latitude limit to their range in eastern Australia                                                     | Journal of Experimental Marine Biology and Ecology | 2018          | X   |          |              | X       |         |            |             |         |         |              | X        | SAT, GPS, acoustic transmitter (depth & T <sub>water</sub> ), in water |
| 198         | Adamczak, SK; Pabst, DA; McLellan, WA; Thorne, LH                                                                     | Using 3D Models to Improve Estimates of Marine Mammal Size and External Morphology                                                                                     | Frontiers in Marine Science                        | 2019          |     |          | X            |         |         |            |             | X       |         |              |          |                                                                        |
| 199         | Chaise, LL; McCafferty, DJ; Krellenstein, A; Gallon, SL; Paterson, WD; Théry, M; Ancel, A; Gilbert, C                 | Environmental and physiological determinants of huddling behavior of molting female southern elephant seals ( <i>Mirounga leonina</i> )                                | Physiology & Behavior                              | 2019          | X   |          |              | X       |         |            |             |         |         | X            | X        | STP, IRT, VHF, TDR, on land                                            |

Supplementary File

| Publication      |                                                                                                                              |                                                                                                                                                                                  |                                     | Study Setting |     |          | Animal State |         |         |            |             |         | Biotelemetry |            | Notes    |                                            |
|------------------|------------------------------------------------------------------------------------------------------------------------------|----------------------------------------------------------------------------------------------------------------------------------------------------------------------------------|-------------------------------------|---------------|-----|----------|--------------|---------|---------|------------|-------------|---------|--------------|------------|----------|--------------------------------------------|
|                  | Publication                                                                                                                  | Title                                                                                                                                                                            | Year                                | Field         | Lab | Modeling | Free-ranging | Trained | Captive | Restrained | Peri-mortem | Carcass | Ex vivo      | Physiology | Behavior |                                            |
| 200              | Guerrero, AI; Rogers, TL                                                                                                     | From low to high latitudes: changes in fatty acid desaturation in mammalian fat tissue suggest a thermoregulatory role                                                           | BMC Evolutionary Biology            | 2019          |     | X        |              |         |         |            |             |         | X            |            |          |                                            |
| 201              | Ji, J; Nabi, G; Zeng, X; Hao, Y; Wang, D                                                                                     | Histological variation in blubber morphology of the endangered east asian finless porpoise ( <i>Neophocaena asiaeorientalis sunameri</i> ) with ontogeny and reproductive states | Zoological Studies                  | 2019          |     | X        |              |         |         |            |             | X       | X            |            |          |                                            |
| 202              | Kastelein, RA; Helder-Hoek, L; Jennings, N; van Kester, R; Huisman, R                                                        | Reduction in Body Mass and Blubber Thickness of Harbor Porpoises ( <i>Phocoena phocoena</i> ) Due to Near-Fasting for 24 Hours in Four Seasons                                   | Aquatic Mammals                     | 2019          |     | X        |              | X       |         |            |             |         |              |            |          |                                            |
| 203              | Lonati, GI; Singleton, EM; Phelps, CE; Koopman, HN; Pabst, DA                                                                | The density of odontocete integument depends on blubber lipid composition and temperature                                                                                        | Marine Mammal Science               | 2019          |     | X        |              |         |         |            |             |         | X            |            |          |                                            |
| 204              | Pearson, LE; Weitzner, EL; Burns, JM; Hammill, MO; Liwanag, HEM                                                              | From ice to ocean: changes in the thermal function of harp seal pelt with ontogeny                                                                                               | Journal of Comparative Physiology B | 2019          |     | X        | X            |         |         |            |             |         | X            |            |          |                                            |
| 205              | Pitman, RL; Durban, JW; Joyce, T; Fearnbach, H; Panigada, S; Lauriano, G                                                     | Skin in the game: Epidermal molt as a driver of long-distance migration in whales                                                                                                | Marine Mammal Science               | 2019          | X   |          |              | X       |         |            |             |         |              |            | X        | SAT, TDR, in water                         |
| 206              | Plön, S; Frainer, G; Wedderburn-Maxwell, A; Cliff, G; Huggenberger, S                                                        | Dorsal fin and hump vascular anatomy in the Indo-Pacific humpback dolphin ( <i>Sousa plumbea</i> ) and the Indo-Pacific bottlenose dolphin ( <i>Tursiops aduncus</i> )           | Marine Mammal Science               | 2019          |     | X        |              |         |         |            |             |         | X            |            |          |                                            |
| 207              | Tuneu-Corral, C; Szteren, D; Cassini, MH                                                                                     | Living on the edge: thermoregulatory behaviour of South American sea lions, <i>Otaria flavescens</i> , at the northern limit of their Atlantic distribution                      | Acta Ethologica                     | 2019          | X   |          |              | X       |         |            |             |         |              |            |          | on land                                    |
| <b>2020-2021</b> |                                                                                                                              |                                                                                                                                                                                  |                                     |               |     |          |              |         |         |            |             |         |              |            |          |                                            |
| 208              | Adamczak, SK; Pabst, DA; McLellan, WA; Thorne, LH                                                                            | Do bigger bodies require bigger radiators? Insights into thermal ecology from closely related marine mammal species and implications for ecogeographic rules                     | Journal of Biogeography             | 2020          |     |          | X            |         |         |            |             | X       |              |            |          | not included in figure                     |
| 209              | Adamczak, SK; McLellan, WA; Read, AJ; Wolfe, CLP; Thorne, LH                                                                 | The impact of temperature at depth on estimates of thermal habitat for short-finned pilot whales                                                                                 | Marine Mammal Science               | 2020          | X   |          |              | X       |         |            |             |         |              |            | X        | not included in figure, TDR                |
| 210              | Chambault, P; Tervo, OM; Garde, E; Hansen, RG; Blackwell, SB; Williams, TM; Dietz, R; Albertsen, CM; Laidre, KL; Nielsen, NH | The impact of rising sea temperatures on an Arctic top predator, the narwhal                                                                                                     | Scientific Reports                  | 2020          | X   |          |              | X       |         |            |             |         |              |            | X        | not included in figure, SAT, GPS, in water |

Supplementary File

| Publication |                                                                                                                                    |                                                                                                                                                        |      | Study Setting |     |          | Animal State |         |         |            |             |         |         | Biotelemetry |          | Notes                                                |
|-------------|------------------------------------------------------------------------------------------------------------------------------------|--------------------------------------------------------------------------------------------------------------------------------------------------------|------|---------------|-----|----------|--------------|---------|---------|------------|-------------|---------|---------|--------------|----------|------------------------------------------------------|
|             | Publication                                                                                                                        | Title                                                                                                                                                  | Year | Field         | Lab | Modeling | Free-ranging | Trained | Captive | Restrained | Peri-mortem | Carcass | Ex vivo | Physiology   | Behavior |                                                      |
| 211         | da Silva, AP; Machado, ASD; Le Bas, AE; Silva, RG; dos Anjos Silva, E; Hernandez-Blazquez, FJ                                      | The skin structures and their role in the thermoregulation of the South American fur seal ( <i>Arctocephalus australis</i> )                           | 2020 |               | X   |          |              |         |         |            |             |         | X       |              |          | not included in figure                               |
| 212         | Haase, CG; Fletcher Jr, RJ; Slone, DH; Reid, JP; Butler, SM                                                                        | Traveling to thermal refuges during stressful temperatures leads to foraging constraints in a central-place forager                                    | 2020 | X             |     |          | X            |         |         |            |             |         |         |              | X        | not included in figure, SAT, GPS, in water           |
| 213         | Heide-Jørgensen, MP; Blackwell, SB; Williams, TM; Sinding, MHS; Skovrind, M; Tervo, OM; Garde, E; Hansen, RG; Nielsen, NH; Ngô, MC | Some like it cold: Temperature-dependent habitat selection by narwhals                                                                                 | 2020 | X             |     |          | X            |         |         |            |             |         |         |              | X        | not included in figure, TDR, CTD, SAT, GPS, in water |
| 214         | Walcott, SM; Kirkham, AL; Burns, JM                                                                                                | Thermoregulatory costs in molting Antarctic Weddell seals: impacts of physiological and environmental conditions                                       | 2020 | X             |     |          |              |         |         | X          |             |         |         | X            |          | not included in figure, IRT, on land                 |
| 215         | Guerrero, AI; Rogers, TL; Sepúlveda, M                                                                                             | Conditions influencing the appearance of thermal windows and the distribution of surface temperature in hauled-out southern elephant seals             | 2021 | X             |     |          | X            |         |         |            |             |         |         | X            |          | not included in figure, IRT, in water                |
| 216         | John, JS; Thometz, NM; Boerner, K; Denum, L; Kendall, TL; Richter, BP; Gaspard, JC; Williams, TM                                   | Metabolic tradeoffs in tropical and subtropical marine mammals—Unique maintenance and locomotion costs in West Indian manatees and Hawaiian monk seals | 2021 |               | X   |          |              | X       |         |            |             |         |         |              | X        | not included in figure, accelerometry, on land       |
| 217         | Sumich, JL                                                                                                                         | Why Baja? A bioenergetic model for comparing metabolic rates and thermoregulatory costs of gray whale calves ( <i>Eschrichtius robustus</i> )          | 2021 |               |     | X        |              |         |         |            |             |         |         |              |          | not included in figure                               |
| 218         | Wright, T; Davis, RW; Pearson, HC; Murray, M; Sheffield-Moore, M                                                                   | Skeletal muscle thermogenesis enables aquatic life in the smallest marine mammal                                                                       | 2021 |               | X   |          |              |         |         |            |             |         | X       |              |          | not included in figure                               |



## References

1. Scholander PF, Irving L, Grinnell SW. On the Temperature and Metabolism of the seal during diving. *J Cell Comp Physiol* 1942;**19**:67–78.
2. Parry DA. The Structure of Whale Blubber, and a Discussion of its Thermal Properties. *Q J Microsc Sci* 1949;**90**:13–25.
3. Scholander PF, Schevill WE. Counter-Current Vascular Heat Exchange in the Fins of Whales. *J Appl Physiol* 1955;**8**:279–82.
4. Bartholomew GA, Wilke F. Body Temperature in the Northern Fur Seal, *Callorhinus ursinus*. *J Mammal* 1956;**37**:327–37.
5. Irving L, Hart JS. The metabolism and insulation of seals as bare-skinned mammals in cold water. *Can J Zool* 1957;**35**:497–511.
6. Hart JS, Irving L. The energetics of harbor seals in air and in water with special consideration of seasonal changes. *Can J Zool* 1959;**37**:447–57.
7. Irving L, Peyton LJ, Bahn CH *et al.* Regulation of Temperature in Fur Seals. *Physiol Zool* 1962;**35**:275–84.
8. Bryden MM. Insulating capacity of the subcutaneous fat of the Southern elephant seal. *Nature* 1964:1299–300.
9. Ling JK. Functional significance of sweat glands and sebaceous glands in seals. *Nature* 1965;**208**:560–2.
10. Ling JK. The skin and hair of the Southern Elephant Seal *Mirounga leonina* (L.) III. morphology of the adult integument. *Aust J Zool* 1968;**16**:629–45.
11. Tarasoff FJ, Fisher HD. Anatomy of the hind flippers of two species of seals with reference to thermoregulation. *Can J Zool* 1970;**48**:821–9.
12. Hampton IFG, Whittow GC, Szekerczes J *et al.* Heat transfer and body temperature in the Atlantic bottlenosed dolphin, *Tursiops truncatus*. *Int J Biometeorology* 1971;**15**:247–53.
13. McGinnis SM, Southworth TP. Thermoregulation in the northern elephant seal, *Mirounga angustirostris*. *Comp Biochem Physiol* 1971;**40A**:893–8.
14. White FN, Odell DK. Thermoregulatory Behavior of the Northern Elephant Seal, *Mirounga angustirostris*. *J Mammal* 1971;**52**:758–74.
15. McGinnis SM, Whittow GC, Ohata CA *et al.* Body heat dissipation and conservation in two species of dolphins. *Comp Biochem Physiol* 1972;**43**:417–23.
16. Ohata CA, Matsuura DT, Whittow GC *et al.* Diurnal Rhythm of Body Temperature in the Hawaiian Monk Seal (*Monachus schauinslandi*). *Pacific Sci* 1972;**26**:117–20.
17. Whittow GC, Matsuura DT, Lin YC. Temperature Regulation in the California Sea Lion (*Zalophus californianus*). *Physiol Zool* 1972;**45**:68–77.
18. Gentry RL. Thermoregulatory Behavior of Eared Seals. *Behaviour* 1973;**46**:73–93.
19. Matsuura DT, Whittow GC. Evaporative heat loss in the California sea lion and harbor seal. *Comp Biochem Physiol* 1974;**48**:20.
20. Morrison P, Rosenmann M, Estes JA. Metabolism and Thermoregulation in the Sea Otter. *Physiol Zool* 1974;**47**:218–29.
21. Odell DK. Behavioral thermoregulation in the California Sea Lion. *Behav Biol* 1974;**10**:231–7.
22. Ohata CA, Whittow GC. Conductive heat loss to sand in California sea lions and a harbor seal. *Comp Biochem Physiol* 1974;**47**:23–6.
23. Whittow GC, Hampton IFG, Matsuura DT *et al.* Body Temperature of Three Species of Whales. *J Mammal* 1974;**55**:653–6.
24. Luecke RH, Natarajan V, South FE. A mathematical biothermal model of the California sea lion. *J Therm Biol* 1975;**1**:35–45.
25. McGinnis SM. Peripheral Heat Exchange in Phocids. *Rapp P-v Reun Cons int Explor Mer* 1975;**169**:481–6.
26. Miller K, Irving L. Metabolism and temperature regulation in young harbor seals *Phoca vitulina richardi*. *Am J Physiol* 1975;**229**:506–11.
27. Molyneux AGS, Bryden MM. Arteriovenous Anastomoses in the Skin of the Weddell Seal, *Leptonychotes weddelli*. *Science (80- )* 1975;**189**:1100–2.

28. Whittow GC, Szekerczes J, Kridler E *et al.* Skin Structure of the Hawaiian Monk Seal (*Monachus schauinslandi*). *Pacific Sci* 1975;**29**:153–7.
29. Hampton IFG, Whittow GC. Body temperature and heat exchange in the Hawaiian spinner dolphin, *Stenella longirostris*. *Comp Biochem Physiol* 1976;**55A**:195–7.
30. Miller K, Rosenmann M, Morrison P. Oxygen uptake and temperature regulation of young harbor seals (*Phoca vitulina richardi*) in water. *Comp Biochem Physiol Part A Physiol* 1976;**54**:105–7.
31. Hammel HT, Elsner RW, Heller HC *et al.* Thermoregulatory responses to altering hypothalamic temperature in the harbor seal. *Am J Physiol Regul Integr Comp Physiol* 1977;**232**:R18–26.
32. Ohata CA, Miller LK. Northern fur seal thermoregulation: thermal responses to forced activity on land. *J Therm Biol* 1977;**2**:135–40.
33. Ohata CA., Miller L. K. Some Temperature Responses of Northern Fur Seal (*Callorhinus ursinus*) Pups. *J Mammal* 1977;**58**:438–40.
34. Ohata CA, Miller LK, Kajimura H. Northern fur seal thermoregulation: Thermal responses to pelagic conditions. *J Therm Biol* 1977;**2**:135–40.
35. Bryden MM, Molyneux GS. Arteriovenous anastomoses in the skin of seals: II. The California Sea Lion *Zalophus californianus* and the Northern Fur Seal *Callorhinus ursinus* (Pinnipedia: Otariidae). *Anat Rec* 1978;**96**:285–300.
36. Molyneux GS, Bryden MM. Arteriovenous Anastomoses in the Skin of Seals: I. The Weddell Seal *Leptonychotes weddelli* and the Elephant Seal *Mirounga leonina* (Pinnipedia: Phocidae). *Anat Rec* 1978;**191**:239–51.
37. Øritsland NA, Ronald K. Aspects of temperature regulation in harp seal pups evaluated by in vivo experiments and computer simulations. *Acta Physiol Scand* 1978;**103**:263–9.
38. Blix AS, Grav HJ, Ronald K. Some aspects of temperature regulation in newborn harp seal pups. *Am J Physiol* 1979;**236**:R188–97.
39. Blix AS, Miller LK, Keyes MC *et al.* Newborn northern fur seals (*Callorhinus ursinus*)—do they suffer from cold? *Am J Physiol* 1979;**236**:R322–327.
40. Gallivan GJ, Ronald K. Temperature regulation in freely diving harp seals (*Phoca groenlandica*). *Can J Zool* 1979;**57**:2256–63.
41. Zapol WM, Liggins GC, Schneider RC *et al.* Regional blood flow during simulated diving in the conscious Weddell seal. *J Appl Physiol* 1979;**47**:968–73.
42. Kooyman GL, Wahrenbrock EA, Castellini MA *et al.* Aerobic and anaerobic metabolism during voluntary diving in Weddell seals: Evidence of preferred pathways from blood chemistry and behavior. *J Comp Physiol B* 1980;**138**:335–46.
43. Costa DP, Kooyman GL. Oxygen consumption, thermoregulation, and the effect of fur oiling and washing on the sea otter, *Enhydra lutris*. *Can J Zool* 1982;**60**:2761–7.
44. Blix AS, Fay FH, Ronald K. On testicular cooling in phocid seals. *Polar Res* 1983;**1**:231–3.
45. Gallivan GJ, Best RC, Kanwisher JW. Temperature Regulation in the Amazonian Manatee *Trichechus inunguis*. *Physiol Zool* 1983;**56**:255–62.
46. Irvine AB. Manatee Metabolism and Its Influence on Distribution in Florida. *Biol Conserv* 1983;**25**:315–34.
47. Costa DP, Kooyman GL. Contribution of Specific Dynamic Action to Heat Balance and Thermoregulation in the Sea Otter *Enhydra lutris*. *Physiol Zool* 1984;**57**:199–203.
48. Brodie P, Paasche A. Thermoregulation and energetics of fin and sei whales based on postmortem, stratified temperature measurements. *Can J Zool* 1985;**63**:2267–9.
49. Limberger D, Trillmich F, Biebach H *et al.* Temperature regulation and microhabitat choice by free-ranging Galapagos fur seal pups (*Arctocephalus galapagoensis*). *Oecologia* 1986;**69**:53–9.
50. Yasui WY, Gaskin DE. Energy budget of a small cetacean, the harbour porpoise, *phocoena phocoena* (L.). *Ophelia* 1986;**25**:183–97.
51. Folkow LP, Schytte Blix A. Nasal heat and water exchange in gray seals. *Am J Physiol* 1987;**253**:R883–9.
52. Hill RD, Schneider RC, Liggins GC *et al.* Heart rate and body temperature during free diving of Weddell seals. *Am Physiol Soc* 1987:R344–51.
53. Thompson SD., Ono KA., Oftedal OT. *et al.* Thermoregulation and Resting Metabolic Rate of California Sea Lion (*Zalophus californianus*) Pups. *Physiol Zool* 1987;**60**:730–6.
54. Campagna C, Le Boeuf BJ. Thermoregulatory behaviour of southern sea lions and its effect on mating strategies. *Behaviour* 1988;**107**:72–90.

55. Ryg M, Smith TG, Øritsland NA. Thermal significance of the topographical distribution of blubber in ringed seals (*Phoca hispida*). *Can J Fish Aquat Sci* 1988;**45**:985–92.
56. Folkow LP, Schytte Blix A. Thermoregulatory control of expired air temperature in diving harp seals. *Am J Physiol - Regul Integr Comp Physiol* 1989;**257**:306–10.
57. Kasting NW, Adderley SAL, Safford T *et al.* Thermoregulation in Beluga (*Delphinapterus leucas*) and Killer (*Orcinus orca*) Whales. *Physiol Zool* 1989;**62**:687–701.
58. Doidge DW. Integumentary heat loss and blubber distribution in the beluga *Delphinapterus leucas*, with comparisons to the narwhal, *Monodon monoceros*. *Can Bull Fish Aquat Sci* 1990;**224**:129–40.
59. Hokkanen JEI. Temperature regulation of marine mammals. *J Theor Biol* 1990;**145**:465–85.
60. Innes S, Worthy GAJ, Lavigne DM *et al.* Surface area of phocid seals. *Can J Zool* 1990;**68**:2531–8.
61. Lavigne DM, Innes S, Worthy GAJ *et al.* Lower critical temperatures of blue whales, *Balaenoptera musculus*. *J Theor Biol* 1990;**144**:249–57.
62. Øritsland NA, Markussen NH. Outline of a physiologically based model for population energetics. *Ecol Modell* 1990;**52**:267–88.
63. Ryg M, Lydersen C, Markussen NH *et al.* Estimating the blubber content of phocid seals. *Can J Fish Aquat Sci* 1990;**47**:1223–7.
64. Trites AW. Thermal Budgets and Climate Spaces: The Impact of Weather on the Survival of Galapagos (*Arctocephalus galapagoensis* Heller) and Northern Fur Seal Pups (*Callorhinus ursinus* L.). *Funct Ecol* 1990;**4**:753.
65. Worthy GAJ, Edwards EF. Morphometric and biochemical factors affecting heat loss in a small temperate cetacean (*Phocoena phocoena*) and a small tropical cetacean (*Stenella attenuata*). *Physiol Zool* 1990;**63**:432–42.
66. Francis JM, Boness DJ. The effect of thermoregulatory behaviour on the mating system of the Juan Fernandez fur seal, *Arctocephalus philippii*. *Behaviour* 1991;**119**:104–26.
67. Little GJ. Thyroid morphology and function and its role in thermoregulation in the newborn southern elephant seal (*Mirounga leonina*) at Macquarie Island. *J Anat* 1991;**176**:55–69.
68. Smith TG, Hammill MO, Taugbol G. A review of the developmental, behavioural and physiological adaptations of the ringed seal, *Phoca hispida*, to life in the Arctic winter. *Arctic* 1991;**44**:124–31.
69. Worthy GAJ. Insulation and thermal balance of fasting harp and grey seal pups. *Comp Biochem Physiol* 1991;**100**:845–51.
70. Cuyler LC, Wiulstrod R, Oritsland NA. Thermal infrared radiation from free living whales. *Mar Mammal Sci* 1992;**8**:120–34.
71. Folkow LP, Blix AS. Metabolic rates of minke whales. *Acta Physiol Scand* 1992;**146**:141–50.
72. Rommel SA, Pabst DA, McLellan WA *et al.* Anatomical evidence for a countercurrent heat exchanger associated with dolphin testes. *Anat Rec* 1992;**232**:150–6.
73. Ponganis PJ, Kooyman GL, Castellini MA *et al.* Muscle temperature and swim velocity profiles during diving in a Weddell seal, *Leptonychotes Weddellii*. *J Exp Biol* 1993;**183**:341–8.
74. Rommel SA, Pabst D, McLellan WA. Functional Morphology of the Vascular Plexuses Associated With the Cetacean Uterus. *Anat Rec* 1993;**2**.
75. Ryg M, Lydersen C, Knutsen L *et al.* Scaling of insulation in seals and whales. *J Zool* 1993;**230**:193–206.
76. Watts P, Hansen S, Lavigne DM. Models of heat loss by marine mammals: thermoregulation below the zone of irrelevance. *J Theor Biol* 1993;**163**:505–25.
77. Kvasdheim PH, Folkow LP, Blix AS. A new device for measurement of the thermal conductivity of fur and blubber. *J Therm Biol* 1994;**19**:431–5.
78. Rommel SA, Pabst DA, McLellan WA *et al.* Temperature regulation of the testes of the bottlenose dolphin (*Tursiops truncatus*): evidence from colonic temperatures. *J Comp Physiol B* 1994;**164**:130–4.
79. Beck GG, Smith TG. Distribution of blubber in the northwest Atlantic harp seal, *Phoca groenlandica*. *Can J Zool* 1995;**73**:1991–8.

80. Boily P. Theoretical Heat Flux in Water and Habitat Selection of Phocid Seals and Beluga Whales during the Annual Molt. *J Theor Biol* 1995;**172**:235–44.
81. Hansen S, Lavigne DM, Innes S. Energy metabolism and thermoregulation in juvenile harbor seals (*Phoca vitulina*) in air. *Physiol Zool* 1995;**68**:290–315.
82. Kastelein RA, van der Sijs SJ, Staal C *et al.* Blubber thickness in harbour porpoises (*Phocoena phocoena*). *Food Consumption and Growth in Marine Mammals*. 1995, 179–99.
83. Little GJ. Body temperature in the newborn southern elephant seal, *Mirounga leonina*, at Macquarie Island. *Mar Mammal Sci* 1995;**11**:480–90.
84. Pabst DA, Rommel SA, McLellan WA *et al.* Thermoregulation of the intra-abdominal testes of the bottlenose dolphin (*Tursiops truncatus*) during exercise. *J Exp Biol* 1995;**198**:221–6.
85. Rommel SA, Early GA, Matassa KA *et al.* Venous structures associated with thermoregulation of phocid seal reproductive organs. *Anat Rec* 1995;**243**:390–402.
86. Boily P, Lavigne DM. Thermoregulation of juvenile grey seals, *Halichoerus grypus*, in air. *Can J Zool* 1996;**74**:201–8.
87. Kvasdheim PH, Folkow LP, Blix AS. Thermal conductivity of minke whale blubber. *J Therm Biol* 1996;**21**:123–8.
88. Hansen S, Lavigne DM. Ontogeny of the Thermal Limits in the Harbor Seal (*Phoca vitulina*). *Physiol Zool* 1997;**70**:85–92.
89. Heyning JE, Mead JG. Thermoregulation in the Mouths of Feeding Gray Whales. *Science (80- )* 1997;**278**:1138–9.
90. Hind AT, Gurney WSC. The metabolic cost of swimming in a marine homeotherm. *J Exp Biol* 1997;**200**:531–42.
91. Kastelein RA, Koene P, Nieuwstraten SH *et al.* Skin surface temperature changes in a harbour porpoise (*phocoena phocoena*) while on land. *The Biology of the Harbour Porpoise*. 1997, 225–64.
92. Kvasdheim PH, Folkow LP. Blubber and flipper heat transfer in harp seals. *Acta Physiol Scand* 1997;**161**:385–95.
93. Kvasdheim PH, Gotaas ARL, Folkow LP *et al.* An Experimental Validation of Heat Loss Models for Marine Mammals. *J Theor Biol* 1997;**184**:15–23.
94. Rosen DAS, Renouf D. Seasonal Changes in Blubber Distribution in Atlantic Harbor Seals: Indications of Thermodynamic Considerations. *Mar Mammal Sci* 1997;**13**:229–40.
95. Hind AT, Gurney WSC. Are there thermoregulatory constraints on the timing of pupping for harbour seals? *Can J Zool* 1998;**76**:2245–54.
96. Koopman HN. Topographical distribution of the blubber of harbor porpoises (*Phocoena phocoena*). *J Mammal* 1998;**79**:260–70.
97. Heath ME, Ridgway SH. How dolphins use their blubber to avoid heat stress during encounters with warm water. *Am J Physiol* 1999;**276**:R1188–94.
98. Noren DP, Williams TM, Berry P *et al.* Thermoregulation during swimming and diving in bottlenose dolphins (*Tursiops truncatus*). *J Comp Physiol B* 1999;**169**:93–9.
99. Williams TM, Noren D, Berry P *et al.* The Diving Physiology of Bottlenose Dolphins (*Tursiops Truncatus*): III. Thermoregulation at Depth. *J Exp Biol* 1999;**202**:2763–9.
100. Boily P, Kvasdheim PH, Folkow LP. Cutaneous Heat Flux Models do not Reliably Predict Metabolic Rates of Marine Mammals. *J Theor Biol* 2000;**207**:317–23.
101. Boyd IL. Skin temperatures during free-ranging swimming and diving in Antarctic fur seals. *J Exp Biol* 2000;**203**:1907–14.
102. Donohue MJ, Costa DP, Goebel ME *et al.* The ontogeny of metabolic rate and thermoregulatory capabilities of northern fur seal, *Callorhinus ursinus*, pups in air and water. *J Exp Biol* 2000;**203**:1003–16.
103. Mauck B, Eysel U, Dehnhardt G. Selective heating of vibrissal follicles. *J Exp Biol* 2000;**203**:2125–31.
104. Heyning JE. Thermoregulation in feeding baleen whales: Morphological and physiological evidence. *Aquat Mamm* 2001;**27**:284–8.
105. Jobsis PD, Ponganis PJ, Kooyman GL. Effects of training on forced submersion responses in harbor seals. *J Exp Biol* 2001;**204**:3877–85.
106. Rommel SA, Pabst DA, McLellan WA. Functional morphology of venous structures associated with the male and female reproductive systems in Florida manatees (*Trichechus manatus latirostris*). *Anat Rec* 2001;**264**:339–47.

107. Koopman HN, Pabst DA, McLellan WA *et al.* Changes in blubber distribution and morphology associated with starvation in the harbor porpoise (*Phocoena phocoena*): Evidence for regional differences in blubber structure and function. *Physiol Biochem Zool* 2002;**75**:498–512.
108. Kvadsheim PH, Aarseth JJ. Thermal function of phocid seal fur. *Mar Mammal Sci* 2002;**18**:952–62.
109. Meagher EM, McLellan WA, Westgate AJ *et al.* The relationship between heat flow and vasculature in the dorsal fin of wild bottlenose dolphins *Tursiops truncatus*. *J Exp Biol* 2002;**205**:3475–86.
110. Noren DP. Thermoregulation of Weaned Northern Elephant Seal (*Mirounga angustirostris*) Pups in Air and Water. *Physiol Biochem Zool* 2002;**75**:513–23.
111. Twiss SD, Wright NC, Dunstone N *et al.* Behavioral evidence of thermal stress from overheating in UK breeding gray seals. *Mar Mammal Sci* 2002;**18**:455–68.
112. Mauck B, Bilgmann K, Jones DD *et al.* Thermal windows on the trunk of hauled-out seals: hot spots for thermoregulatory evaporation? *J Exp Biol* 2003;**206**:1727–38.
113. Rommel SA, Caplan H. Vascular adaptations for heat conservation in the tail of Florida manatees (*Trichechus manatus latirostris*). *J Anat* 2003;**202**:343–53.
114. Rosen DAS, Trites AW. No Evidence for Bioenergetic Interaction between Digestion and Thermoregulation in Steller Sea Lions *Eumetopias jubatus*. *Physiol Biochem Zool* 2003;**76**:899–906.
115. Elsner R, Meiselman HJ, Baskurt OK. Temperature-viscosity relations of bowhead whale blood: A possible mechanism for maintaining cold blood flow. *Mar Mammal Sci* 2004;**20**:339–44.
116. Elsner R, George JC, O’Hara T. Vasomotor responses of isolated peripheral blood vessels from bowhead whales: Thermoregulatory implications. *Mar Mammal Sci* 2004;**20**:546–53.
117. Ortiz RM, Worthy GAJ. Could lower body fat mass contribute to cold-water susceptibility in calves of the West Indian manatee (*Trichechus manatus*)? *Mar Mammal Sci* 2004;**20**:176–83.
118. Rutishauser MR, Costa DP, Goebel ME *et al.* Ecological implications of body composition and thermal capabilities in young antarctic fur seals (*Arctocephalus gazella*). *Physiol Biochem Zool* 2004;**77**:669–81.
119. Samuel AM, Worthy GAJ. Variability in fatty acid composition of bottlenose dolphin (*Tursiops truncatus*) blubber as a function of body site, season, and reproductive state. *Can J Zool* 2004;**82**:1933–42.
120. Silva RG. Assessment of body surface temperature in cetaceans: an iterative approach. *Brazilian J Biol* 2004;**64**:719–24.
121. Struntz DJ, McLellan WA, Dillaman RM *et al.* Blubber Development in Bottlenose Dolphins (*Tursiops truncatus*). *J Morphol* 2004;**259**:7–20.
122. Bossart GD, Meisner RA, Rommel SA *et al.* Pathological features of the Florida manatee cold stress syndrome. *Aquat Mamm* 2005;**29**:9–17.
123. Dunkin RC, McLellan WA, Blum JE *et al.* The ontogenetic changes in the thermal properties of blubber from Atlantic bottlenose dolphin *Tursiops truncatus*. *J Exp Biol* 2005;**208**:1469–80.
124. Harding KC, Fujiwara M, Axberg Y *et al.* Mass-dependent energetics and survival in Harbour Seal pups. *Funct Ecol* 2005;**19**:129–35.
125. Kvadsheim PH, Folkow LP, Blix AS. Inhibition of shivering in hypothermic seals during diving. *Am J Physiol Regul Integr Comp Physiol* 2005;**289**:326–31.
126. McCafferty DJ, Moss S, Bennett K *et al.* Factors influencing the radiative surface temperature of grey seal (*Halichoerus grypus*) pups during early and late lactation. *J Comp Physiol B Biochem Syst Environ Physiol* 2005;**175**:423–31.
127. Rotherham LS, van der Merwe M, Bester MN *et al.* Morphology and distribution of sweat glands in the Cape fur seal, *Arctocephalus pusillus pusillus* (Carnivora:Otariidae). *Aust J Zool* 2005;**53**:295–300.
128. Thornton SJ, Hochachka PW, Crocker DE *et al.* Stroke volume and cardiac output in juvenile elephant seals during forced dives. *J Exp Biol* 2005;**208**:3637–43.
129. Willis K, Horning M. A novel approach to measuring heat flux in swimming animals. *J Exp Mar Bio Ecol* 2005;**315**:147–62.
130. Willis K, Horning M, Rosen DAS *et al.* Spatial variation of heat flux in Steller sea lions: evidence for consistent avenues of heat exchange along the body trunk. *J Exp Mar Bio Ecol* 2005;**315**:163–75.

131. Beentjes MP. Behavioral thermoregulation of the New Zealand sea lion (*Phocartos hookeri*). *Mar Mammal Sci* 2006;**22**:311–25.
132. Ponganis PJ, Stockard TK, Levenson DH *et al.* Cardiac output and muscle blood flow during rest-associated apneas of elephant seals. *Comp Biochem Physiol - A Mol Integr Physiol* 2006;**144**:105–11.
133. Koopman HN. Phylogenetic, ecological, and ontogenetic factors influencing the biochemical structure of the blubber of odontocetes. *Mar Biol* 2007;**151**:277–91.
134. Mellish J-AE, Horning M, York AE. Seasonal and Spatial Blubber Depth Changes in Captive Harbor Seals (*Phoca vitulina*) and Steller's Sea Lions (*Eumetopias jubatus*). *J Mammal* 2007;**88**:408–14.
135. Werth AJ. Adaptations of the cetacean hyolingual apparatus for aquatic feeding and thermoregulation. *Anat Rec* 2007;**290**:546–68.
136. Westgate AJ, McLellan WA, Wells RS *et al.* A new device to remotely measure heat flux and skin temperature from free-swimming dolphins. *J Exp Mar Bio Ecol* 2007;**346**:45–59.
137. Hasselberg BA, Thomas JA. Using an Infrared Temperature Sensor to Study Microhabitat Selection in Captive California Sea Lions (*Zalophus californianus*). *Aquat Mamm* 2008;**34**:212–28.
138. Meagher EM, McLellan WA, Westgate AJ *et al.* Seasonal patterns of heat loss in wild bottlenose dolphins (*Tursiops truncatus*). *J Comp Physiol B* 2008;**178**:529–43.
139. Montie EW, Garvin SR, Fair PA *et al.* Blubber morphology in wild bottlenose dolphins (*Tursiops truncatus*) from the Southeastern United States: Influence of geographic location, age class, and reproductive state. *J Morphol* 2008;**269**:496–511.
140. Noren SR, Pearson LE, Davis J *et al.* Different thermoregulatory strategies in nearly weaned pup, yearling, and adult Weddell seals (*Leptonychotes weddelli*). *Physiol Biochem Zool* 2008;**81**:868–79.
141. Ponganis PJ, Kreutzer U, Stockard TK *et al.* Blood flow and metabolic regulation in seal muscle during apnea. *J Exp Biol* 2008;**211**:3323–32.
142. Yeates LC, Houser DS. Thermal tolerance in bottlenose dolphins (*Tursiops truncatus*). *J Exp Biol* 2008;**211**:3249–57.
143. Castellini MA, Trumble SJ, Mau TL *et al.* Body and blubber relationships in Antarctic pack ice seals: Implications for blubber depth patterns. *Physiol Biochem Zool* 2009;**82**:113–20.
144. Hammill MO, Ryg M, Chabot D. Seasonal changes in energy requirements of harp seals. *J Northwest Atl Fish Sci* 2009;**42**:135–52.
145. Liwanag HEM, Williams TM, Costa DP *et al.* The effects of water temperature on the energetic costs of juvenile and adult California sea lions (*Zalophus californianus*): the importance of skeletal muscle thermogenesis for thermal balance. *J Exp Biol* 2009;**212**:3977–84.
146. Noren SR, Wells RS. Blubber Deposition during Ontogeny in Free-Ranging Bottlenose Dolphins: Balancing Disparate Roles of Insulation and Locomotion. *J Mammal* 2009;**90**:629–37.
147. Barbieri MM, McLellan WA, Wells RS *et al.* Using infrared thermography to assess seasonal trends in dorsal fin surface temperatures of free-swimming bottlenose dolphins (*Tursiops truncatus*) in Sarasota Bay, Florida. *Mar Mammal Sci* 2010;**26**:53–66.
148. Blix AS, Walløe L, Messelt EB *et al.* Selective brain cooling and its vascular basis in diving seals. *J Exp Biol* 2010;**213**:2610–6.
149. Liwanag HEM. Energetic Costs and Thermoregulation in Northern Fur Seal (*Callorhinus ursinus*) Pups: The Importance of Behavioral Strategies for Thermal Balance in Furred Marine Mammals. *Physiol Biochem Zool* 2010;**83**:898–910.
150. Meir JU, Ponganis PJ. Blood Temperature Profiles of Diving Elephant Seals. *Physiol Biochem Zool* 2010;**83**:531–40.
151. Nienaber J, Thomson J, Horning M *et al.* Surface temperature patterns in seals and sea lions: A validation of temporal and spatial consistency. *J Therm Biol* 2010;**35**:435–40.
152. Norris AL, Houser DS, Crocker DE. Environment and activity affect skin temperature in breeding adult male elephant seals (*Mirounga angustirostris*). *J Exp Biol* 2010;**213**:4205–12.
153. Houser DS, Yeates LC, Crocker DE. Cold stress induces an adrenocortical response in bottlenose dolphins (*Tursiops truncatus*). *J Zoo Wildl Med* 2011;**42**:565–71.
154. Bagge LE, Koopman HN, Rommel SA *et al.* Lipid class and depth-specific thermal properties in the blubber of the short-finned pilot whale and the pygmy sperm whale. *J Exp Biol* 2012;**215**:4330–9.

155. Durban JW, Pitman RL. Antarctic killer whales make rapid, round-trip movements to subtropical waters: evidence for physiological maintenance migrations? *Biol Lett* 2012;**8**:274–7.
156. Erdsack N, Hanke FD, Dehnhardt G *et al.* Control and amount of heat dissipation through thermal windows in harbor seals (*Phoca vitulina*). *J Therm Biol* 2012;**37**:537–44.
157. Khamas WA, Smodlaka H, Leach-Robinson J *et al.* Skin histology and its role in heat dissipation in three pinniped species. *Acta Vet Scand* 2012;**54**:46.
158. Liwanag HEM, Berta A, Costa DP *et al.* Morphological and thermal properties of mammalian insulation: the evolution of fur for aquatic living. *Biol J Linn Soc* 2012;**106**:926–39.
159. Liwanag HEM, Berta A, Costa DP *et al.* Morphological and thermal properties of mammalian insulation: the evolutionary transition to blubber in pinnipeds. *Biol J Linn Soc* 2012;**107**:774–87.
160. McClelland SJ, Gay M, Ann D *et al.* Microvascular Patterns in the Blubber of Shallow and Deep Diving Odontocetes. *J Morphol* 2012;**273**:932–42.
161. Mellish J, Nienaber J, Polasek L *et al.* Beneath the surface: Profiling blubber depth in pinnipeds with infrared imaging. *J Therm Biol* 2012;**38**:10–3.
162. Paterson W, Sparling CE, Thompson D *et al.* Seals like it hot: Changes in surface temperature of harbour seals (*Phoca vitulina*) from late pregnancy to moult. *J Therm Biol* 2012;**37**:454–61.
163. Erdsack N, Dehnhardt G, Hanke W. Coping with Heat: Function of The Natal Coat of Cape Fur Seal (*Arctocephalus Pusillus Pusillus*) Pups in Maintaining Core Body Temperature. *PLoS One* 2013;**8**:72081.
164. Ford TJ, Werth AJ, George JC. An Intraoral Thermoregulatory Organ in the Bowhead Whale (*Balaena mysticetus*), the Corpus Cavernosum Maxillaris. *Anat* 2013;**296**:701–8.
165. Rodríguez-Prieto V, Rubio-García A, Melero M *et al.* Identification of the pattern of appearance and development of thermal windows in the skin of juvenile Pacific walrus (*Odobenus rosmarus divergens*) in a controlled environment. *Mar Mammal Sci* 2013;**29**:167–76.
166. Dalton AJM, Rosen DAS, Trites AW. Broad thermal capacity facilitates the primarily pelagic existence of northern fur seals (*Callorhinus ursinus*). *Mar Mammal Sci* 2014;**30**:994–1013.
167. Erdsack N, Dehnhardt G, Hanke W. Thermoregulation of the vibrissal system in harbor seals (*Phoca vitulina*) and Cape fur seals (*Arctocephalus pusillus pusillus*). *J Exp Mar Bio Ecol* 2014;**452**:111–8.
168. Garlepp L, Logan M, Kirkwood R. Behavioral responses of Australian fur seals (*Arctocephalus pusillus doriferus*) to environmental variations. *Mar Mammal Sci* 2014;**30**:978–93.
169. Horgan P, Booth D, Nichols C *et al.* Insulative capacity of the integument of the dugong (*Dugong dugon*): thermal conductivity, conductance and resistance measured by in vitro heat flux. *Mar Biol* 2014;**161**:1395–407.
170. Liwanag HEM, Orazé J, Costa DP *et al.* Thermal benefits of aggregation in a large marine endotherm: Huddling in California sea lions. *J Zool* 2014;**293**:152–9.
171. Pearson LE, Liwanag HEM, Hammill MO *et al.* Shifts in thermoregulatory strategy during ontogeny in harp seals (*Pagophilus groenlandicus*). *J Therm Biol* 2014;**44**:93–102.
172. Pearson LE, Liwanag HEM, Hammill MO *et al.* To each its own: Thermoregulatory strategy varies among neonatal polar phocids. *Comp Biochem Physiol -Part A Mol Integr Physiol* 2014;**178**:59–67.
173. Rosen DAS, Trites AW. Thermal limits in young northern fur seals, *Callorhinus ursinus*. *Mar Mammal Sci* 2014;**30**:1014–28.
174. Ball HC, Stavarz M, Oldaker J *et al.* Seasonal and Ontogenetic Variation in Subcutaneous Adipose Of the Bowhead Whale (*Balaena mysticetus*). *Anat Rec* 2015;**298**:1416–23.
175. Ekdale EG, Kienle SS. Passive Restriction of Blood Flow and Counter-Current Heat Exchange Via Lingual Retia in the Tongue of a Neonatal Gray Whale *Eschrichtius robustus* (Cetacea, Mysticeti). *Anat Rec* 2015;**298**:675–9.
176. Erdsack N, Dehnhardt G, Witt M *et al.* Unique fur and skin structure in harbor seals (*Phoca vitulina*)-thermal insulation, drag reduction, or both? *J R Soc Interface* 2015;**12**:1–7.
177. Gmuca N V., Pearson LE, Burns JM *et al.* The fat and the furriest: Morphological changes in harp seal fur with ontogeny. *Physiol Biochem Zool* 2015;**88**:158–66.
178. Gómez-Campos E, Borrell A, Correas J *et al.* Topographical variation in lipid content and morphological structure of the blubber in the striped dolphin. *Sci Mar* 2015;**79**:189–97.
179. Hashimoto O, Ohtsuki H, Kakizaki T *et al.* Brown Adipose Tissue in Cetacean Blubber. *PLoS One* 2015;**10**, DOI: 10.1371/journal.pone.0116734.

180. Hindle AG, Horning M, Mellish JAE. Estimating total body heat dissipation in air and water from skin surface heat flux telemetry in Weddell seals. *Anim Biotelemetry* 2015;**3**:1–11.
181. Melero M, Rodríguez-Prieto V, Rubio-García A *et al.* Thermal reference points as an index for monitoring body temperature in marine mammals. *BMC Res Notes* 2015;**8**:411.
182. Mellish J-A, Hindle A, Skinner J *et al.* Heat loss in air of an Antarctic marine mammal, the Weddell seal. *J Comp Physiol B* 2015;**185**:143–52.
183. Noren SR, Udevitz MS, Triggs L *et al.* Identifying a reliable blubber measurement site to assess body condition in a marine mammal with topographically variable blubber, the Pacific walrus. *Mar Mammal Sci* 2015;**31**:658–76.
184. Sakurai Y, Okamatsu-Ogura Y, Saito M *et al.* Brown adipose tissue expresses uncoupling protein 1 in newborn harbor seals (*Phoca vitulina*). *Mar Mammal Sci* 2015;**31**:818–27.
185. Zeng X, Ji J, Hao Y *et al.* Topographical distribution of blubber in finless porpoises (*neophocaena asiaeorientalis sunameri*): A result from adapting to living in coastal waters. *Zool Stud* 2015;**54**:1–11.
186. Codde SA, Allen SG, Houser DS *et al.* Effects of environmental variables on surface temperature of breeding adult female northern elephant seals, *Mirounga angustirostris*, and pups. *J Therm Biol* 2016;**61**:98–105.
187. Cornick LA, Quakenbush LT, Norman SA *et al.* Seasonal and developmental differences in blubber stores of beluga whales in Bristol Bay, Alaska using high-resolution ultrasound. *J Mammal* 2016;**97**:1238–48.
188. Beltran RS, Testa JW, Burns JM. An agent-based bioenergetics model for predicting impacts of environmental change on a top marine predator, the Weddell seal. *Ecol Modell* 2017;**351**:36–50.
189. Ladds MA, Slip DJ, Harcourt RG *et al.* Intrinsic and extrinsic influences on standard metabolic rates of three species of Australian otariid. *Conserv Biol* 2017;**5**:1–14.
190. Sharma N, Liwanag HEM. The effects of submergence on the thermal function of pinniped fur. *Mar Mammal Sci* 2017;**33**:611–20.
191. Singleton EM, McLellan WA, Koopman HN *et al.* Lipid composition and thermal properties of the blubber of Gervais' beaked whale (*Mesoplodon europaeus*) across ontogeny. *Mar Mammal Sci* 2017;**33**:695–705.
192. Chaise LL, Prinet I, Toscani C *et al.* Local weather and body condition influence habitat use and movements on land of molting female southern elephant seals (*Mirounga leonina*). *Ecol Evol* 2018;**8**:6081–90.
193. Erdsack N, McCully Phillips SR, Rommel SA *et al.* Heat flux in manatees: an individual matter and a novel approach to assess and monitor the thermal state of Florida manatees (*Trichechus manatus latirostris*). *J Comp Physiol B* 2018;**188**:717–27.
194. García-Aguilar MC, Turrent C, Elorriaga-Verplancken FR *et al.* Climate change and the northern elephant seal (*Mirounga angustirostris*) population in Baja California, Mexico. *PLoS One* 2018;**13**:1–15.
195. Krmpotic CM, Loza CM, Negrete J *et al.* Integument in Antarctic seals: A comparative study and its relation to extreme environments. *Acta Zool* 2018;**99**:281–95.
196. Rojano-Donãte L, McDonald BI, Wisniewska DM *et al.* High field metabolic rates of wild harbour porpoises. *J Exp Biol* 2018;**221**, DOI: 10.1242/jeb.185827.
197. Zeh DR, Heupel MR, Hamann M *et al.* Evidence of behavioural thermoregulation by dugongs at the high latitude limit to their range in eastern Australia. *J Exp Mar Bio Ecol* 2018;**508**:27–34.
198. Adamczak SK, Pabst A, McLellan WA *et al.* Using 3D Models to Improve Estimates of Marine Mammal Size and External Morphology. *Front Mar Sci* 2019;**6**:1–12.
199. Chaise LL, McCafferty DJ, Krellenstein A *et al.* Environmental and physiological determinants of huddling behavior of molting female southern elephant seals (*Mirounga leonina*). *Physiol Behav* 2019;**199**:182–90.
200. Guerrero AI, Rogers TL. From low to high latitudes: changes in fatty acid desaturation in mammalian fat tissue suggest a thermoregulatory role. *BMC Evol Biol* 2019;**19**:1–12.
201. Ji J, Nabi G, Zeng X *et al.* Histological variation in blubber morphology of the endangered east asian finless porpoise (*Neophocaena asiaeorientalis sunameri*) with ontogeny and reproductive states. *Zool Stud* 2019;**58**:1–11.
202. Kastelein RA, Helder-Hoek L, Jennings N *et al.* Reduction in body mass and blubber thickness of harbor porpoises (*Phocoena phocoena*) due to near-fasting for 24 hours in four seasons. *Aquat*



*Mamm* 2019;**45**:37–47.

203. Lonati GL, Singleton EM, Phelps CE *et al.* The density of odontocete integument depends on blubber lipid composition and temperature. *Mar Mammal Sci* 2019;**35**:595–616.

204. Pearson LE, Weitzner EL, Burns JM *et al.* From ice to ocean: changes in the thermal function of harp seal pelt with ontogeny. *J Comp Physiol B* 2019;**189**:501–11.

205. Pitman RL, Durban JW, Joyce T *et al.* Skin in the game: Epidermal molt as a driver of long-distance migration in whales. *Mar Mammal Sci* 2019:1–30.

206. Plön S, Frainer G, Wedderburn-Maxwell A *et al.* Dorsal fin and hump vascular anatomy in the Indo-Pacific humpback dolphin (*Sousa plumbea*) and the Indo-Pacific bottlenose dolphin (*Tursiops aduncus*). *Mar Mammal Sci* 2019;**35**:684–95.

207. Tuneu-Corral C, Szteren D, Cassini MH. Living on the edge: thermoregulatory behaviour of South American sea lions, *Otaria flavescens*, at the northern limit of their Atlantic distribution. *Acta Ethol* 2019;**22**:67–71.

208. Adamczak SK, Ann Pabst D, McLellan WA *et al.* Do bigger bodies require bigger radiators? Insights into thermal ecology from closely related marine mammal species and implications for ecogeographic rules. *J Biogeogr* 2020;**47**:1193–206.

209. Adamczak SK, McLellan WA, Read AJ *et al.* The impact of temperature at depth on estimates of thermal habitat for short-finned pilot whales. *Mar Mammal Sci* 2020:1–14.

210. Chambault P, Tervo OM, Garde E *et al.* The impact of rising sea temperatures on an Arctic top predator, the narwhal. *Sci Rep* 2020;**10**:1–10.

211. da Silva AP, Machado ASD, Le Bas AE *et al.* The skin structures and their role in the thermoregulation of the South American fur seal (*Arctocephalus australis*). *Anat Rec* 2020;**303**:3155–67.

212. Haase CG, Fletcher RJ, Slone DH *et al.* Traveling to thermal refuges during stressful temperatures leads to foraging constraints in a central-place forager. *J Mammal* 2020;**101**:271–80.

213. Heide-Jørgensen MP, Blackwell SB, Williams TM *et al.* Some like it cold: Temperature-dependent habitat selection by narwhals. *Ecol Evol* 2020;**10**:8073–90.

214. Walcott SM, Kirkham AL, Burns JM. Thermoregulatory costs in molting Antarctic Weddell seals: impacts of physiological and environmental conditions. *Conserv Physiol* 2020;**8**:1–14.

215. Guerrero AI, Rogers TL, Sepúlveda M *et al.* Conditions influencing the appearance of thermal windows and the distribution of surface temperature in hauled-out southern elephant seals. *Conserv Physiol* 2021;**9**, DOI: 10.1093/conphys/coaa141.

216. John JS, Thometz NM, Boerner K *et al.* Metabolic trade-offs in tropical and subtropical marine mammals: unique maintenance and locomotion costs in West Indian manatees and Hawaiian monk seals. *J Exp Biol* 2021;**224**, DOI: 10.1242/jeb.237628.

217. Sumich JL. Why Baja? A bioenergetic model for comparing metabolic rates and thermoregulatory costs of gray whale calves (*Eschrichtius robustus*). *Mar Mammal Sci* 2021;**37**:870–87.

218. Wright T, Davis RW, Pearson HC *et al.* Skeletal muscle thermogenesis enables aquatic life in the smallest marine mammal. *Science (80- )* 2021;**373**:223–5.
